1 **A quantitative medico-botanical expedition of Fairy Meadows**  
2 **National Park, Diamir, Gilgit Baltistan, Pakistan**

3

4 Rahmat Wali<sup>a</sup>, Khalid Rahman<sup>b</sup>, Naveed Iqbal Raja<sup>a</sup>, Rahmatullah Qureshi<sup>a</sup>, Zia-  
5 ur-Rehman Mashwani<sup>a\*</sup>

6 <sup>a</sup>Department of Botany, PMAS Arid Agriculture University, Rawalpindi, Pakistan

7 <sup>b</sup>Department of Botany, Government Post Graduate College Kohat, Pakistan

8

9

10

11 **\*Correspondence author:**

12 Zia-ur-Rehman Mashwani

13 Postal Address: Department of Botany, PMAS Arid Agriculture University, Rawalpindi, 46300,

14 Pakistan

15 Email: [zia.botany@gmail.com](mailto:zia.botany@gmail.com)

16 Phone: 0092-333-9022077

17

## 18 **Abstract**

19 This study was conducted to investigate the ethnobotanical knowledge of the population of the  
20 Fairy Meadow National Park, Diamir, Gilgit Baltistan. The study area was previously ignored  
21 due to physical barriers, remoteness and religious extremism. The use of medicinal plants for  
22 various maladies, known to the elders of the community and passed orally to the younger  
23 generation was documented. A total of 146 informants were interviewed using semi-structured  
24 questionnaires. The data was quantitatively analyzed employing frequency of citation (FC), use  
25 value (UV), relative frequency of citation (RFC) along with Pearson correlation coefficient  
26 (PCC). A total of 90 plants species belonging to 77 genera and 49 different families have been  
27 documented. These medicinal plants were used against 55 diseases, especially stomach problems  
28 (23.3%), cough (17.7%), asthma and fever (16.6%). For 31 out of 90 plants species which had  
29 been reported either, new uses (28 plants) or new use-report (3 plants) were found. New reported  
30 medicinal plants include *Allium gilgitensis*, *Astragalus gilgitensis* and *Pedicularia flava*. The  
31 majority of the documented plants were wild collected (86%), herbs (60%), and leaves were the  
32 most widely used part (27%). The common method of preparation was powder (27%) mainly  
33 administered orally (81.7%). The highest use values were found for *Berberis lyceum* (5.47),  
34 *Thymus linearis* (5.07) and *Rhododendron anthopogon* (5.0), while the plants with greater  
35 relative frequency of citation were *Berberis lyceum* (0.97), *Thymus linearis* (0.89) and  
36 *Rhododendron anthopogon* (0.75). The Pearson correlation coefficient is 0.836 between RFC  
37 and UV showing high positive association. This study was an extension to the ethnobotanical  
38 work done in Pakistan previously. We documented a wealth of traditional knowledge, and could  
39 record the uses of various species for the first time from Pakistan. The new use reports and new

40 plants reported supplement the foundation of pharmacology and new drug development for  
41 complex and challenging disease.

42 **Keywords:** Ethnobotany, Medicinal Plants, Ethnic Groups, Fairy Meadow, Diamir, Gilgit  
43 Baltistan.

44

## 45 **Introduction**

46 The concept of ethnobotany was introduced by US botanist John Harshberger in 1896 [1] and  
47 attempts to gather, evaluate and analyze plant traditional use information possessed by the  
48 population of a certain area [2]. Traditional plant use is a millennial practice focusing on useful  
49 plants for the welfare of people including food, treatment against diseases and monetary  
50 elevation of society [3, 4]. Members of remote and traditional societies are often well versed in  
51 plants knowledge, and the therapeutic qualities of plants, using about 400–600 plants  
52 ethnomedicinally in Pakistan [1, 5-7]. Ethnobotanical knowledge mainly is transferred orally  
53 from generation to generation over time and has advanced in a multidisciplinary way into a  
54 specific discipline manifesting people–plant relationship [8]. Tribal people harbor rich data about  
55 the utilization of plants or plant parts as medicine [9].

56 The high elevation ecosystems of the Himalayas are regarded as hotspot for researchers  
57 exploring and documenting ethnobotanical treasures including direct financial benefits rendered  
58 to the local community as well as a source of medicine. Most of the medicinal plants  
59 documented from Pakistan are thought to be restricted to hilly areas [10-28].

60 Gilgit Baltistan (GB) is a region of prominent strategic and geographic importance, forming a  
61 geo-corridor exploited at times by various forces and empires, and borders contemporary powers

62 like China, Russia and India. Gilgit Baltistan has an extraordinarily varied landscape, due to the  
63 fact that here three famous mountainous ranges, including Himalayas, Karakoram and Hindu  
64 Kush meet. Few ethnobotanical studies were conducted in the neighboring parts of these ranges  
65 [29]. Fairy Meadow was constantly ignored because of its remoteness, difficult geology, high  
66 elevation, and strict social and religious bans for outsiders. The local population gives much  
67 significance to plants for their livelihood and medicinal purposes, and thus there was an urgent  
68 need to document the medicinal flora and associated traditional knowledge of this area. Such  
69 ethnobotanical inventories can provide the starting point for the development of new drugs [30-  
70 32]. This study constitutes the first endeavor to explore the study area ethnobotanically with  
71 focus on medicinal plants.

## 72 **Materials and methods**

73 The present study was carried out during June 2015 to September 2016. In this period the study  
74 area was visited several times according to the availability of the medicinal flora.

75

## 76 **Study area**

77 The study area is a natural alpine meadow at the base of Nanga Parbat, which is located at a  
78 latitude of 35°N and longitude of 74 °E. From the Karakorum Highway (KKH), this region is  
79 situated towards the south side at a short distance of 15 km, and 443 km from Islamabad, the  
80 capital of Pakistan (**Fig. 1**). The area is called “Fairy Meadow,” which originated from the  
81 German climber Willy Merkl in 1930, after his unsuccessful endeavor to achieve the summit of  
82 Nanga Parbat [33]. However, the local name is “Fantori,” which means “the place where  
83 moustaches bearing people live.” Fairy Meadow is popular for its lofty magnificence and is the  
84 heart of the northern region of Pakistan. It is also called “Paradise on Earth” because of the  
85 incomparable beauty it possesses. The area has been a major attraction for nature lovers as well  
86 as researchers, climbers and photographers for a very long period. The rich and lush green  
87 forests around fairy meadows provide an excellent habitat for wildlife. Tatu, Jail, Phongtori,  
88 Fairy Meadows, Bayal Camp, Bathrait, Bezar and Veterare the main villages of the study area.

89

## 90 **Socio-economic conditions of the area**

91 The local community of Diamir is very poor. This is a result of the fact that Diamir is physically  
92 isolated, with narrow valleys and high peaks, forcing inhabitants to depend on local resources for  
93 food and other essential needs. The flora of the Diamir district is very diverse, with many

94 medicinal plants and hundreds of other economically important species. Local communities  
95 mainly depend upon wild plant resources for their variety of economic purposes. The local  
96 livelihood strategy has shifted over time from hunting to agriculture, animal husbandry, forestry,  
97 trade and tourism.

98

99 **Fig. 1.** Map of the study area. (A)Pakistan (B) Gilgit Baltistan (C) Diamir.

100

## 101 **Ethnographic composition**

102 The study area has a unique composition in terms of ethnography. Different ethnic groups are  
103 living in the area, including Sheen, Youshkon, Gujar, Dulasgar, Khelochey and Kashmiri. The  
104 dominant ethnic groups are Sheen, followed by Youshkon, Gujar, khelochey, gujar and dulasgar  
105 (**Table1**). All the ethnic groups have their own languages; however, the common and dominant  
106 language is Shina (100%).

107

108 **Table 1**

109 Demographic characteristics of Fairy Meadow.

| <b>Demographic feature</b> | <b>Criteria</b>  | <b>Number of informants</b> | <b>Percentage</b> |
|----------------------------|------------------|-----------------------------|-------------------|
| Gender of informants       | Male             | 101                         | 69.18             |
|                            | Female           | 45                          | 30.82             |
| Age of informants          | Less than 20     | 30                          | 20.55             |
|                            | Between 20 to 30 | 23                          | 15.75             |
|                            | Between 31 to 40 | 28                          | 19.18             |
|                            | Between 41 to 50 | 29                          | 19.86             |

|                   |                   |     |       |
|-------------------|-------------------|-----|-------|
|                   | Between 51 to 60  | 21  | 14.38 |
|                   | Above 60          | 15  | 10.27 |
| Marital status    | Married           | 104 | 71.92 |
|                   | Unmarried         | 25  | 17.12 |
|                   | Widow             | 2   | 0.68  |
| Education level   | Illiterate        | 101 | 69.18 |
|                   | Elementary School | 25  | 17.12 |
|                   | Secondary School  | 7   | 4.79  |
|                   | College           | 9   | 6.16  |
|                   | University        | 4   | 2.74  |
| Employment Status | Farmer            | 97  | 66.44 |
|                   | Retired           | 3   | 2.05  |
|                   | Shepherd          | 33  | 22.6  |
|                   | Others            | 13  | 8.9   |
| Residence         | Village           | 124 | 84.93 |
|                   | City              | 22  | 15.07 |
| Ethnic group      | Youshkon          | 38  | 26.03 |
|                   | Sheen             | 74  | 50.68 |
|                   | Gujar             | 12  | 8.22  |
|                   | Dulasgar          | 2   | 1.37  |
|                   | Khelochey         | 19  | 13.01 |
|                   | Kashmiri          | 1   | 0.68  |
| Experience        | Herbalists        | 2   | 1.37  |

|                                                  |                    |     |       |
|--------------------------------------------------|--------------------|-----|-------|
|                                                  | Local people       | 144 | 98.63 |
| Duration of residence<br>in the<br>surveyed area | Less than 15 years | 27  | 18.5  |
|                                                  | More than 15 years | 119 | 81.5  |

110

#### 111 2.4 Ethnobotanical documentation

112 Different methods including semi-structured interviews, questionnaires, participant observation  
113 and walk-in-the-woods were used for the documentation of ethnobotanical data. In addition,  
114 focus group discussions were arranged to gain further information on medicinal plants  
115 knowledge of the community and authenticity of the data collected through semi-structured  
116 interviews. Interviews were conducted after obtaining oral prior informed consent from the  
117 participants. All interviews were conducted in Shina.

118

#### 119 **Plant collection and identification**

120 Interviews and discussions were followed by a voucher specimen collection with the help field  
121 assistants. Specimens were systematically tagged, air-dried, pressed and mounted on herbarium  
122 sheets, each one labelled and voucher number allotted (**Table 2**). The botanical identification of  
123 the specimens was done by Prof. Dr. Rahmatullah Qureshi, a taxonomist at Pir Mehar Ali Shah,  
124 Arid Agriculture University Rawalpindi (PMAS AAUR), Pakistan and authenticated with the  
125 help of flora of Pakistan ([www.eflora.com](http://www.eflora.com)). The plant follows the International Plant Name  
126 Index (IPNI). The specimens were also photographed during collection in the field, shown in  
127 (**Fig. 2**) and allocated a voucher number (**Fig. 3**). The mounted specimens were deposited in the  
128 Herbarium of Department of Botany PMAS AAUR, Pakistan.



129

130

131 **Fig. 2.** Medicinal plants collected from the study area. (A) *Berberis lyceum*, (B) *Limonium*  
132 *cabulicum*, (C) *Pinus wallichiana*, (D) *Hippophae rhamnoides*, (E) *Rosa webbiana*, (F) *Datura*  
133 *stramonium*, (G) *Rheum australe* (H) *Rubus ulmifolius*

134

135

136 **Fig. 3.** Medicinal plants with voucher number. (A) *Saussurea gossypiphora*, (B) *Ephedra*  
137 *gerardiana*, (C) *Cichorium intybus*, (D) *Thymus linearis*, (E) *Rosa webbiana*, (F) *Capparis*  
138 *spinosa* , (G) *Anaphalis nepalensis* and (H) *Betula utilis*

139

## 140 **Data management**

141 The data recorded in the field was entered in Microsoft Excel. Data was organized in a tabulated  
142 form for presentation. The graphical representation was based on numerical data extracted.

143

## 144 **Statistical analysis**

145 The collected ethnomedicinal data was quantitatively analyzed using indices of relative  
146 frequency citation (RFC), use value (UV) and Pearson correlation coefficient (PCC).

147

### 148 **Relative frequency of citation (RFC)**

149 This index showed the local importance of each species. It is calculated using formula given by  
150 [34]:

151 RFC=FC/N

152 Where FC is the number of informants mentioning the use of the species and N is the total  
153 number of informants involved in the survey (N=146), without considering the use-categories  
154 [35].

155

### 156 **Use value (UV)**

157 The Use Value (UV) shows the relative importance of plants known locally. It was calculated  
158 using the formula given by [36]:

$$159 \quad UV = \sum U_i / N$$

160 Where  $U_i$  is the total number of uses mentioned by each informant for a single species and N is  
161 the total number of informants interviewed for a given species.

162

### 163 **Pearson correlation coefficient (PCC)**

164 For the interpretation of collected data, Pearson Correlation Coefficient was used which is a  
165 good measure to numerically quantify the nature of the linear relationship between two variables.  
166 It is the ratio of the covariance between two variables to their standard deviations.

167

### 168 **Ethical Approval of field Research:**

169 This research was approved by the Advanced Study and Research Board (AS&RB) from PMAS  
170 Arid Agriculture University, Rawalpindi, Pakistan in its 45th meeting vide notification No.  
171 PMAS-AAUR/DAS/1064 dated 11 June, 2018.

## 172 **Results and discussion**

### 173 **Ethnographic composition and ethnobotanical documentation**

174 A total of 146 informants of different age groups were interviewed, including 101 (69.16%) men  
175 and 45 (30.82%) women. Among these, 30 (20.55%) informants were less than 20 years old, 23  
176 (15.75%) were between 20 to 30 years, 28 (19.18%) were 31 to 40 years, 29 (19.86%) were 41 to  
177 50 years, 21 (14.38%) were 51 to 60 years and 15 (10.27%) were above 60 years old. Among all  
178 the informants the oldest was 83 years old and the youngest 15 years old. Most of the informants  
179 104 (71.92%) were married, 25 (17.12%) were unmarried, and 2 (0.68%) were widowed. Out of  
180 146 informants, 101 (70.55%) were illiterate and the rest literate. It was observed that 97  
181 (66.44%) informants were farmers, followed by 3 (2.05%) retired from government jobs, 33  
182 (22.6%) were shepherds and 15 (8.9%) followed other occupations. A majority of 124 (84.93%) of  
183 the informants were residing in villages, and only a few (15, 22.07%) in cities. One-hundred-  
184 and-nineteen (81.5%) informants had been residing in the surveyed area for more than 15 years,  
185 and 27 (18.5%) less than 15 years. The study area has six ethnic groups. Among these, Sheen  
186 were in majority 74 (50.68%), followed by Youshkon 38 (26.03%), Khelochay 19 (13.01%), 12  
187 (8.22%) gujars, 2 (1.37%) Dulasgar and 1 (0.68%) Kashmiri. Details on informant composition  
188 are given in **Table 1**. The primary local language spoken in the area is Shina (100% of the  
189 population) while the other locally known languages include Khilocha, Gujriya, Kashmiri and  
190 Dulasgariya.

191 During the fieldwork it became apparent that the local people self-medicated in case of any  
192 disease. Only in case of failure of home remedies, they consulted herbalists, and 2 (1.37%) of the  
193 total informants accessed modern health facilities [37].

## 195 **Medicinal plants diversity and ethnobotanical enrichment**

196 A total of 90 plant species belonging to 77 genera and 49 different families were reported in this  
197 study (**Table 2**). The dominant plant families were Asteraceae represented by 9 plant species (10  
198 %) followed by Polygonaceae and Rosaceae with 8 plant species each (8.88 %), Pinaceae and  
199 Scrophulariaceae with 4 species each (4.44 %), Apiaceae, Fabaceae and Ranunculaceae with 3  
200 species each (3.33 %), while rest of the families were represented by less than 3 species each  
201 (**Fig. 4**). The large number of medicinal plants in Asteraceae in this study agree with a previous  
202 study in a neighboring district Skardu [38] and coincide with the findings of [37] and [39].  
203 Eleven different use categories were mentioned by the informants. Among the use categories,  
204 medicinal use was highest (**Fig.5**). The dominant life form used was herbs (60%), followed by  
205 trees (26%), shrubs (13%), and woody climbers (1%) (**Fig. 6**). These results are in  
206 correspondence with a previous ethnobotanical study in India [37]. Most of the ethnomedicinally  
207 important plants were wild collected (81%), and the remaining 19% cultivated. The majority of  
208 the plants were only used medicinally, but 28 species were used both medicinally and for other  
209 purposes in the study area. The most used parts were leaf (27%), followed by fruit (19%), root  
210 (16%), stem (12%), bark (8%), flower (6%), whole plant (5%), gum (3%), seed (2%), cone and  
211 latex were used rarely (1%) (**Fig. 7**). These results correlate clearly with a previous study in  
212 Gilgit Baltistan [38]. Various forms of herbal preparations were used in the study area, the most  
213 common preparation methods were powder (27%), decoction (16%), direct use (13%), juice  
214 (11%), extract and paste (8%) each, infusion (5%), poultice (4%) saag and smoke/fragrance (3%)  
215 each and ash (2%) (**Fig. 8**). These results closely resemble with the studies conducted in different  
216 parts of the world where leaves stood out as the used part [40-43]. The reason behind the  
217 excessive medicinal uses of leaves is easy collection, as compared to other parts [40]. In

218 addition, leaves often carry a high variety of different metabolites [44]. The reported plant  
219 species were used as herbal medicines for the treatment of 55 different health disorders. Most  
220 common diseases treated are stomach problems, cough, asthma, and fever. Details are shown in  
221 **(Fig. 9)**. The common route of administration was oral (81.7%), followed by external (8.7%),  
222 topical (7.7%) and inhalation (1.9%) **(Fig. 10)**. These findings are contrary to the results of [45].  
223 These similarities and differences may correspond to the cultural similarities and differences  
224 leading to the plant part use or purpose of use difference.

225

226

227 **Fig. 4.** Dominant families in study area

228

229 **Table 2**

230 Medicinal Plants with botanical name, voucher number, family, local name, habit, part used, medicinal uses, UV, FC, RFC, mode of utilization,  
 231 administration route and comparison with previous ethnobotanical data.

232

| Scientific name<br>Voucher<br>number     | Family        | Local name       | Habit | Part<br>used | Medicinal uses                                                                                                   | UV   | FC | RFC  | Mode<br>of<br>use | Administration | Comparison with<br>previous<br>ethnobotanical<br>data |
|------------------------------------------|---------------|------------------|-------|--------------|------------------------------------------------------------------------------------------------------------------|------|----|------|-------------------|----------------|-------------------------------------------------------|
| <i>Allium cepa</i> L.<br>RW-647          | Alliaceae     | Paloan/<br>Kasho | H     | L, St        | Diarrhea, increases blood<br>pressure, spice, salad.                                                             | 0.8  | 25 | 0.17 | J, Di             | Or             | 1●2●3●4■5●6●7<br>●8●9■10●11●12<br>●13●14●             |
| <i>Allium gilgiticum</i><br>L.<br>RW-648 | Alliaceae     | Khatpa           | H     | S            | Pain, headache, vegetable,<br>forage.                                                                            | 0.66 | 39 | 0.26 | Sa                | Or             | 1●2●3●4■5●6●7<br>●8●9●10●11●12<br>●13●14●             |
| <i>Pistacia khinjuk</i><br>L.<br>RW-698  | Anacardiaceae | Khakao           | T     | G, F         | Cough, asthma, gum used to<br>remove phlem, gum smoke<br>eye problems, hair removing<br>and broken pots, forage, | 1.1  | 41 | 0.28 | Po, P             | Or             | 1●2●3■4■5●6■7<br>■8●9●10●11■12<br>●13■14●             |

|                                                                |              |            |   |      |                                                                                                                                                  |      |    |      |           |       |                                           |
|----------------------------------------------------------------|--------------|------------|---|------|--------------------------------------------------------------------------------------------------------------------------------------------------|------|----|------|-----------|-------|-------------------------------------------|
|                                                                |              |            |   |      | Wood sold as fuel wood.                                                                                                                          |      |    |      |           |       |                                           |
| <i>Bunium persicum</i><br>(Boiss) B.<br>Fedtsch.<br>RW-660     | Apiaceae     | Hayao      | H | F    | Pneumonia, digestive, Spice,<br>aromatic, appetite stimulant,<br>herbal tea, cough, stomachic,<br>fever, headache, forage, high<br>market price. | 3.5  | 90 | 0.61 | Po,<br>Di | Or    | 1●2□3●4●5●6●7<br>●8●9●10●11●12<br>●13●14● |
| <i>Heracleum</i><br><i>candicans</i> Wall.<br>ex DC.<br>RW-680 | Apiaceae     | Polia      | H | L, R | Forage, backbone ache,<br>stomachic, digestive, healing<br>purpose.                                                                              | 1.8  | 35 | 0.23 | Di,<br>Po | To/Or | 1●2●3●4●5●6●7<br>●8●9●10●11●12<br>●13■14● |
| <i>Pimpinella</i><br><i>diversifolia</i> DC.<br>.RW-700        | Apiaceae     | Choro      | H | R    | Intestinal worms, asthma,<br>reduce blood thickness,<br>stomachic, used to enhance<br>digestion, forage.                                         | 2.4  | 69 | 0.47 | Po        | Or    | 1●2●3●4●5●6●7<br>●8●9●10■11●12<br>●13●14● |
| <i>Asparagus</i><br><i>officinalis</i> L.<br>RW-653            | Asparagaceae | Sharkachey | H | St   | Anti-inflammatory, diabetes,<br>anti-oxidant, digestive, anti-<br>cancer, maintains blood<br>glucose level, forage.                              | 0.42 | 33 | 0.22 | Di,<br>po | Or    | 1●2●3●4●5●6●7<br>●8●9●10●11●12<br>●13●14● |
| <i>Anacyclus</i>                                               | Asteraceae   | Peli ponar | H | Wp   | Sore throat, eye wash,                                                                                                                           | 0.33 | 12 | 0.08 | De,       | E/Or  | 1●2●3●4●5●6●7                             |

|                                                               |            |             |    |    |                                                                          |      |    |      |           |    |                                               |
|---------------------------------------------------------------|------------|-------------|----|----|--------------------------------------------------------------------------|------|----|------|-----------|----|-----------------------------------------------|
| <i>pyrethrum</i> L.<br>RW-649                                 |            |             |    |    | toothache and forage.                                                    |      |    |      | Po        |    | ●8●9●10●11●12<br>●13●14●                      |
| <i>Anaphalis nepalensis</i><br>(Spreng) Hand.-Mazz.<br>RW-650 | Asteraceae | Cheki ponar | H  | F  | Stomachic, aromatic, forage.                                             | 0.57 | 11 | 0.07 | Fu,<br>Po | Or | 1●2■3●4●5●6●7<br>●8■9●10●11●12<br>●13●14●     |
| <i>Artemisia glacialis</i> L.<br>RW-651                       | Asteraceae | Nerlay zoon | Sh | L  | Diarrhea, nausea, intestinal worms, helpful in pregnancy.                | 1.66 | 32 | 0.21 | J         | Or | 1●2●3●4●5●6●7<br>●8●9●10●11●12<br>●13●14●     |
| <i>Artemisia maritima</i> L.<br>RW-652                        | Asteraceae | Zoon        | Sh | L  | Diarrhea, nausea, fever, Asthma, headache, stomachic, forage, thatching. | 3.37 | 50 | 0.34 | J         | Or | 1□2●3□4□5□6●7<br>●8□<br>9●10●11●12■13<br>●14□ |
| <i>Aster himalaicus</i><br>C. B. Clarke<br>RW-654             | Asteraceae | Zooti ponar | H  | F  | Stomachic, aromatic, forage.                                             | 0.42 | 5  | 0.03 | Fu,<br>Po | Or | 1●2●3●4●5●6●7<br>●8●9●10●11●12<br>●13●14●     |
| <i>Cichorium intybus</i> L.                                   | Asteraceae | Cheti char  | H  | Wp | Healing of wounds, remove dead cells from wounds,                        | 1.14 | 29 | 0.19 | Ex        | E  | 1■2●3■4■5■6■7<br>■8●9●10●11■12                |



|                                                   |               |                 |    |      |                                                                                                                          |      |     |      |            |       |                                           |
|---------------------------------------------------|---------------|-----------------|----|------|--------------------------------------------------------------------------------------------------------------------------|------|-----|------|------------|-------|-------------------------------------------|
| RW-665                                            |               |                 |    |      | bowlspace is also applied to cure boil, forage.                                                                          |      |     |      |            |       | ●13■14●                                   |
| <i>Echinops echinatus</i> Roxb.<br>RW-669         | Asteraceae    | Janchey         | H  | Wp   | Stomachic, cough, Arthritis, analgesic, antibacterial, antioxidant, diuretic, forage.                                    | 1    | 17  | 0.11 | De, Ex     | Or    | 1□2●3●4□5●6□7<br>■8□9●10●11●12<br>●13●14● |
| <i>Gnaphalium sSpp.</i><br>RW-679                 | Asteraceae    | Unknown         | H  | L    | Constipation, menses, sciatica, forage.                                                                                  | 0.42 | 15  | 0.10 | Di         | Or    | 1●2●3●4●5●6●7<br>●8●9●10●11●12<br>●13●14● |
| <i>Saussurea gossypiphora</i> D.<br>Don<br>RW-721 | Asteraceae    | Bushi Ponar     | H  | F    | Asthma, pneumonia, stomach problem, flue, headache, improve circulation, menstrual cycle, <b>discord</b> umbilical cord. | 4    | 77  | 0.52 | Po, In     | Or    | 1●2●3●4●5●6●7<br>●8●9●10●11●12<br>●13●14● |
| <i>Xanthium strumarium</i> L.<br>RW-733           | Asteraceae    | Dadi poshy char | H  | L,St | Swelling, boils.                                                                                                         | 0.87 | 15  | 0.10 | P          | To    | 1●2●3●4●5●6●7<br>●8●9●10●11●12<br>●13●14● |
| <i>Berberis lycium</i><br>Royle<br>RW-656         | Berberidaceae | Chorko          | Sh | Wp   | Bone fracture, pneumonia, headache, stomachic, arthritis, wound healing,                                                 | 5.47 | 141 | 0.96 | Po, Pa, De | To/Or | 1□2□3□4□5□6■7<br>■8□9■10●11□12<br>●13●14□ |

|                                                      |                 |            |    |       |                                                                                                                                                                                       |      |     |      |           |      |                                           |
|------------------------------------------------------|-----------------|------------|----|-------|---------------------------------------------------------------------------------------------------------------------------------------------------------------------------------------|------|-----|------|-----------|------|-------------------------------------------|
|                                                      |                 |            |    |       | delivery, forage, economic.                                                                                                                                                           |      |     |      |           |      |                                           |
| <i>Betula utilis</i> D.<br>Don<br>RW-658             | Betulaceae      | Jonji      | T  | B, St | Religious, spiritual, bark<br>smoke used for removal of<br>placenta after delivery,<br>storage of butter,Thatching,<br>pot making, wood and bark<br>sold in market with high<br>price | 1.87 | 108 | 0.73 | De,<br>Fu | In   | 1●2□3□4■5●6□7<br>■8●9●10□11□12<br>□13●14● |
| <i>Onosma hispida</i><br>Wall. ex G. Don.<br>RW-692  | Boraginaceae    | Sharong    | H  | R, L  | Throat infection, menses,<br>stomachic, general pain in<br>body, asthma, hair and face<br>coloring, lipstick, forage.                                                                 | 1.75 | 35  | 0.23 | De        | E/Or | 1●2●3●4■5●6●7<br>●8●9●10●11●12<br>■13●14● |
| <i>Capparis spinosa</i><br>Juss.<br>RW-661           | Capparidaceae   | Loi margan | Sh | F, R  | Sciatica, rheumatism,<br>backache, diuretic, anti-<br>dandruff, arthritis.                                                                                                            | 0.42 | 17  | 0.11 | Di        | Or   | 1●2●3□4■5□6□7<br>■8●9■10□11■12<br>●13■14□ |
| <i>Silene vulgaris</i><br>(Moench) Garcke<br>/RW-723 | Caryophyllaceae | Unknown    | H  | L     | Cattle forage, intestinal<br>worms, kidney problem.                                                                                                                                   | 0.14 | 13  | 0.08 | Di        | Or   | 1●2●3●4●5●6●7<br>●8●9●10●11●12<br>●13●14● |
| <i>Chenopodium</i>                                   | Chenopodiaceae  | Kunaw      | H  | S     | Constipation, forage.                                                                                                                                                                 | 0.37 | 9   | 0.06 | Sa        | Or   | 1●2●3●4■5□6■7                             |

|                                                               |              |         |   |               |                                                                                                                                                                                                                                                      |      |    |      |           |       |                                           |
|---------------------------------------------------------------|--------------|---------|---|---------------|------------------------------------------------------------------------------------------------------------------------------------------------------------------------------------------------------------------------------------------------------|------|----|------|-----------|-------|-------------------------------------------|
| <i>album</i> L.<br>RW-663                                     |              |         |   |               |                                                                                                                                                                                                                                                      |      |    |      |           |       | ■8●9●10●11□12<br>●13■14■                  |
| <i>Hylotelephium<br/>ewersi</i> (Ledeb.)<br>H. Ohba<br>RW-722 | Crassulaceae | Teetar  | H | Wp            | Constipation, Stomachic.                                                                                                                                                                                                                             | 2    | 80 | 0.54 | Po        | Or    | 1●2●3●4●5●6●7<br>●8●9●10●11●12<br>●13●14● |
| <i>Juniperus<br/>communis</i> L.<br>RW-684                    | Cupressaceae | Muthari | T | F, st,<br>L   | Cold, fever, ash for snuff,<br>roots for stitching of wooden<br>pots, bone fracture, thatching.                                                                                                                                                      | 1.8  | 21 | 0.14 | Po,<br>As | Or    | 1●2■3■4■5●6●7<br>●8●9●10■11●12<br>●13●14■ |
| <i>Juniperus excelsa</i><br>M. Bieb.<br>RW-685                | Cupressaceae | Chilli  | T | F,L,<br>B, St | Berries for diabetes,<br>tuberculosis, Smoke for bad<br>evils, rheumatism, burns,<br>cold fever, arthritis, typhoid<br>fever, wound healing, leaves<br>ash snuff, kidney stone,<br>thatching, fuel, furniture,<br>berries have high market<br>value. | 3.07 | 59 | 0.40 | Pa,<br>Fu | To/Or | 1□2●3□4□5●6■7<br>■8□9●10□11□12<br>●13□14□ |
| <i>Elaeagnus</i>                                              | Elaeagnaceae | Suzoon  | T | Fl, F         | Cough, cold, asthma, fever,                                                                                                                                                                                                                          | 1.5  | 31 | 0.21 | Di        | Or    | 1□2●3■4■5■6□7                             |

|                                                             |              |                   |    |      |                                                                                                                                                          |      |    |      |                      |       |                                           |
|-------------------------------------------------------------|--------------|-------------------|----|------|----------------------------------------------------------------------------------------------------------------------------------------------------------|------|----|------|----------------------|-------|-------------------------------------------|
| <i>angustifolia</i> L.<br>RW-670                            |              |                   |    |      | mental relaxation, fragrant,<br>joshanda.                                                                                                                |      |    |      |                      |       | ■8□9●10■11■12<br>●13●14□                  |
| <i>Hippophae<br/>rhamnoides</i> (L.)<br>A. Nelson<br>RW-681 | Elaeagnaceae | Buro              | Sh | F, L | Anti-cancer, cough, skin care,<br>headache, congestion of<br>bronchi, anti-bacterial and<br>viral, antioxidant, tseeds have<br>high market price, fence. | 5    | 65 | 0.44 | De,<br>Po,<br>In, Pa | To/Or | 1□2□3□4□5■6■7<br>■8□9■10□11■12<br>□13□14□ |
| <i>Ephedra<br/>gerardiana</i> Wall.<br>ex Stapf<br>RW-671   | Ephedraceae  | Soontal           | Sh | S    | Cigarette, cough, cold, flue,<br>nose treatment and in<br>joshanda.                                                                                      | 0.28 | 27 | 0.18 | De,<br>Po            | Or    | 1□2●3●4□5■6■7<br>□8■9■10□11□12<br>■13■14□ |
| <i>Equisetum<br/>hyemale</i> L.<br>RW-672                   | Equisitaceae | Cheyao            | H  | S    | Kidney problems, skin and<br>mouth dryness, forage.                                                                                                      | 0.87 | 37 | 0.25 | J                    | Or    | 1●2●3●4●5●6●7<br>●8●9●10●11●12<br>●13●14● |
| <i>Astragalus<br/>gilgitensis</i> Ali<br>RW-655             | Fabaceae     | Khukunay          | H  | F    | Digestive, Forage.                                                                                                                                       | 0.3  | 34 | 0.23 | Di                   | Or    | 1●2●3●4●5●6●7<br>●8●9●10●11●12<br>●13●14● |
| <i>Cicer<br/>microphyllum</i> L.                            | Fabaceae     | Aseel<br>Khukunay | H  | F    | Forage.                                                                                                                                                  | 0.85 | 21 | 0.14 | Di                   | Or    | 1●2●3●4●5●6●7<br>●8●9●10●11●12            |

|                                            |                 |                    |    |            |                                                                                                 |      |    |      |       |      |                                               |
|--------------------------------------------|-----------------|--------------------|----|------------|-------------------------------------------------------------------------------------------------|------|----|------|-------|------|-----------------------------------------------|
| RW-664                                     |                 |                    |    |            |                                                                                                 |      |    |      |       |      | ●13●14●                                       |
| <i>Medicago sativa</i><br>L.<br>RW-688     | Fabaceae        | Rishka/Ishpit      | H  | S          | lactagogue, saag, fodder and forage.                                                            | 1    | 33 | 0.22 | Sa    | Or   | 1●2●3□4■5●6●7<br>●8■9●10●11□12<br>●13●14■     |
| <i>Quercus incana</i><br>Bartra<br>mRW-709 | Fagaceae        | Bani               | T  | St,<br>L,R | Furniture, cattle forage, fuel wood, thatching, wood is sold in market as fuel and timber wood. | 0.14 | 35 | 0.23 | Di    | Or   | 1●2●3●4●5●6●7<br>●8●<br>9●10●11●12●13<br>●14● |
| <i>Gentiana kurroo</i><br>Royle<br>RW-677  | Gentianaceae    | Cheti char         | H  | S, L,<br>F | Healing, removal of dead cells, boils, headache, cold, fever, malaria, forage.                  | 1.6  | 50 | 0.34 | Pa, J | E/Or | 1●2●3●4●5●6●7<br>●8●9●10●11●12<br>●13●14●     |
| <i>Swertia marginata</i> Royle.<br>RW-726  | Gentianaceae    | Bangra             | H  | L          | Stomachic, Cancer, fever, diuretic, smoking, forage.                                            | 0.42 | 10 | 0.06 | Po    | Or   | 1●2●3●4●5●6●7<br>●8●9●10●11●12<br>●13■14●     |
| <i>Geranium pratense</i> L.<br>RW-678      | Geraniaceae     | Garoo/ratanj<br>ok | H  | R          | After delivery to reduce abdominal pain, backache, forage and milk production in cattle.        | 0.6  | 31 | 0.21 | Po    | Or   | 1●2●3●4□5●6●7<br>●8●9●10●11●12<br>●13●14●     |
| <i>Ribes alpestre</i>                      | Grossulariaceae | Mayar              | Sh | F          | Fever, burns, blisters, coolant                                                                 | 0.37 | 23 | 0.15 | J     | Or   | 1●2●3■4●5●6●7                                 |

|                                               |              |               |    |            |                                                                                                                                                    |      |     |      |                  |    |                                           |
|-----------------------------------------------|--------------|---------------|----|------------|----------------------------------------------------------------------------------------------------------------------------------------------------|------|-----|------|------------------|----|-------------------------------------------|
| Wall.ex. Decne.<br>RW-713                     |              | shatoo/Shatoo |    |            | and forage.                                                                                                                                        |      |     |      |                  |    | ●8●9●10■11■12<br>●13●14●                  |
| <i>Juglans regia</i> L.<br>RW-683             | Juglandaceae | Ashoey        | T  | B, L,<br>F | Cardiac, Brain tonic, bark for maswak, flesh of fresh fruit as coloring agent, leaves insect repellent, cooking oil, fruit have high market value. | 2    | 61  | 0.41 | De,<br>Di        | Or | 1●2●3□4●5□6□7<br>■8●9●10■11●12<br>●13●14● |
| <i>Mentha longifolia</i><br>(L.) L.<br>RW-689 | Labiataeae   | Phileel       | H  | L          | Tooth ache, nausea, cough, fever, diarrhea, intestinal worms, blood purifier, used for blood reduction, healing of wounds.                         | 3.71 | 64  | 0.43 | Pa,<br>Di,<br>Po | Or | 1□2□3●4□5□6●7<br>●8□9●10●11■12<br>●13●14● |
| <i>Thymus linearis</i><br>L.<br>RW-727        | Labiataeae   | Tomurom       | Sh | L          | Oxygenation, flue, stomachic, cough, headache, fever, pneumonia, blood purifier, against obesity, weakness.                                        | 5.06 | 130 | 0.89 | De               | Or | 1●2□3●4□5●6●7<br>●8●9●10●11□12<br>●13□14● |
| <i>Isodon rugosus</i><br>(Wall. ex. Benth)    | Lamiaceae    | Burdal        | H  | L          | Eye problem, malaria, forage.                                                                                                                      | 1.11 | 31  | 0.21 | Ex               | Or | 1●2●3●4●5●6●7<br>●8●9●10■11●12            |

|                                   |          |                               |   |       |                                                                                                                                                                            |      |    |      |              |    |                                           |
|-----------------------------------|----------|-------------------------------|---|-------|----------------------------------------------------------------------------------------------------------------------------------------------------------------------------|------|----|------|--------------|----|-------------------------------------------|
| Codd)<br>RW-682                   |          |                               |   |       |                                                                                                                                                                            |      |    |      |              |    | ●13●14●                                   |
| <i>Ficus carica</i> L.<br>RW-673  | Moraceae | Angrezi<br>phang              | T | F, La | Kidney stone, blood purifier,<br>asthma, obstruction in liver<br>and spleen, latex used for<br>blisters, healing, fruit sold in<br>local market as a asource of<br>income. | 1.12 | 43 | 0.29 | Di           | Or | 1●2●3●4■5□6□7<br>□8■9●10■11●12<br>●13●14● |
| <i>Ficus palmata</i> L.<br>RW-674 | Moraceae | Phang                         | T | F, La | Asthma, Obstruction in liver<br>and spleen, latex used for<br>blisters and healing                                                                                         | 1.3  | 40 | 0.27 | Di           | Or | 1●2●3●4●5●6●7<br>●8●9●10●11●12<br>●13●14● |
| <i>Morus alba</i> L.<br>RW-690    | Moraceae | Peban<br>maroch/sho<br>maroch | T | F     | Cough and facial dropsy,<br>throat infection, memory<br>enhancer, jaundice, fruit have<br>high market price.                                                               | 1.45 | 54 | 0.36 | J, Po        | Or | 1●2●3□4□5□6□7<br>□8●9●10■11●12<br>●13●14● |
| <i>Morus nigra</i> L.<br>RW-691   | Moraceae | Kinay<br>maroch               | T | F     | Jaundice, sore throat, cough,<br>fodder, economic, fruit and<br>wood have market price,<br>forage.                                                                         | 0.57 | 25 | 0.17 | Di, J,<br>Po | Or | 1●2●3●4□5□6□7<br>□8●9●10●11●12<br>●13●14● |

|                                                           |               |          |    |             |                                                                                                                                                                                                                 |      |     |      |           |     |                                           |
|-----------------------------------------------------------|---------------|----------|----|-------------|-----------------------------------------------------------------------------------------------------------------------------------------------------------------------------------------------------------------|------|-----|------|-----------|-----|-------------------------------------------|
| <i>Rhododendron anthopogon</i> D. Don<br>RW-712           | Oleaceae      | Susar    | Sh | L           | Backbone ache, better after delivery, pneumonia, flue, asthma, joint ache, milk production and blood purifier, dizziness.                                                                                       | 5    | 109 | 0.74 | De,<br>Po | Or  | 1●2●3●4●5●6●7<br>●8●9●10●11●12<br>●13□14● |
| <i>Pedicularis pectinata</i> Wall. ex Benn.<br>RW-696     | Orobanchaceae | Unknown  | H  | L           | Stomachic, cardiac, forage.                                                                                                                                                                                     | 0.12 | 31  | 0.21 | Di        | Or  | 1●2●3●4●5●6●<br>7●8●9●10●<br>11●12●13●14● |
| <i>Cedrus deodara</i> (Roxb. ex D. Don) G. Don.<br>RW-662 | Pinaceae      | Phuloosh | T  | St, R,<br>B | Wood extract for external parasites and skin diseases of goat, intestinal worms, gum for asthma, remove pubic hair and welding of broken pots, wood is sold in market as timber and fuel wood with high prices. | 1.44 | 40  | 0.27 | Ex        | Or  | 1●2●3●4●5●6□7<br>■8●9●10●11●12<br>●13●14● |
| <i>Picea smithiana</i> (Wall.) Boiss.                     | Pinaceae      | Kachal   | T  | G           | Asthma, diarrhea, tuberculosis, diabetes, gum                                                                                                                                                                   | 1.66 | 40  | 0.27 | P         | EOr | 1●2●3●4●5●6●7<br>●8●9●10●11●12            |



|                                                       |                |                      |   |             |                                                                                                                                                                                         |      |    |      |           |       |                                                 |
|-------------------------------------------------------|----------------|----------------------|---|-------------|-----------------------------------------------------------------------------------------------------------------------------------------------------------------------------------------|------|----|------|-----------|-------|-------------------------------------------------|
| RW-699                                                |                |                      |   |             | used to repair broken pots,<br>hair removing.                                                                                                                                           |      |    |      |           |       | ●13●14●                                         |
| <i>Pinus gerardiana</i><br>Wall. ex D. Don<br>nRW-701 | Pinaceae       | Chalgoza/tho<br>lesh | T | F, G,<br>Co | Fruit for headache, , cone ash<br>detergent, fodder, fuel,<br>furniture, hair removing,<br>wood and fruit have high<br>market value.                                                    | 1.33 | 63 | 0.43 | As,<br>Di | Or/E  | 1●2●3●4■5●6●7<br>●8●9●10■11●12<br>●13●14●       |
| <i>Pinus wallichiana</i> A. B.<br>Jacks<br>RW-702     | Pinaceae       | Chee                 | T | G           | Heart attack, gum used to<br>cure wound in kidney,<br>stomach and urinary bladder,<br>bronchial congestion, asthma,<br>removal of pubic hair, wood<br>sold in market as timber<br>wood. | 1.8  | 37 | 0.25 | P         | To/Or | 1●2●3■4●5●6●7<br>●8●9●10■11●12<br>●13●14●       |
| <i>Plantago lanceolatae</i> L.<br>RW-703              | Plantaginaceae | khapoy patey         | H | L           | Stops bleeding from nose,<br>animal graze.                                                                                                                                              | 1.6  | 15 | 0.10 | Pa        | Or    | 1●2●3●4●5● 6●<br>7● 8● 9● 10●<br>11● 12●13■ 14● |
| <i>Limonium cabulicum</i>                             | Plumbaginaceae | Hazrat<br>Daroo      | H | Wp          | Asthma, pneumonia,<br>tuberculosis, bleeding from                                                                                                                                       | 2.66 | 47 | 0.32 | Po        | Or    | 1●2●3●4●5●6●7<br>●8●9●10●11●12                  |

|                                                         |              |                  |   |      |                                                                                |      |    |      |           |    |                                               |
|---------------------------------------------------------|--------------|------------------|---|------|--------------------------------------------------------------------------------|------|----|------|-----------|----|-----------------------------------------------|
| (Boiss.) Kuntze<br>RW-686                               |              |                  |   |      | gums, piles, thought to be used for thousand diseases, forage.                 |      |    |      |           |    | ●13●14●                                       |
| <i>Zea mays</i> L.<br>RW-734                            | Poaceae      | Makaey           | H | F    | Paste applied on swelling parts, blisters, as food, fodder, high market price. | 1.37 | 39 | 0.26 | Po/Pa     | Or | 1●2●3●4●5●6●7<br>●8●<br>9●10●11●12●13<br>●14● |
| <i>Bistorta amplexicaulis</i> (D. Don) Greene<br>RW-697 | Polygonaceae | Shey lamay       | H | R    | Backache, stomachic, lactagogue in cattle, thatching, forage.                  | 1.5  | 56 | 0.38 | Po        | Or | 1●2●3●4●5●6●7<br>●8●9●10●11●12<br>●13■14●     |
| <i>Bistorta vivipara</i> L.<br>RW-659                   | Polygonaceae | Chenga           | H | F, R | Fruit edible, throat infection, root for piles, forage.                        | 0.71 | 29 | 0.19 | Di,<br>Ex | Or | 1●2●3●4●5●6●7<br>●8●9●10●11●12<br>●13●14●     |
| <i>Oxyria digyna</i> (L.) Hill<br>RW-693                | Polygonaceae | Nerlay<br>Churki | H | L    | Cattle fodder, used for better digestion.                                      | 0.22 | 21 | 0.14 | Di        | Or | 1●2●3●4■5●6●7<br>●8●9■10●11●12<br>●13■14●     |
| <i>Persicaria affinis</i> D. Don                        | Polygonaceae | Shoni<br>chenga  | H | R    | Fever, forage, thatching.                                                      | 0.28 | 16 | 0.10 | Ex        | Or | 1●2●3●4■5●6●<br>7●8●9●10●11●                  |

|                                                |              |                    |   |    |                                                                                                          |      |    |      |           |       |                                           |
|------------------------------------------------|--------------|--------------------|---|----|----------------------------------------------------------------------------------------------------------|------|----|------|-----------|-------|-------------------------------------------|
| RW-704                                         |              |                    |   |    |                                                                                                          |      |    |      |           |       | 12●13●14●                                 |
| <i>Rheum australe</i><br>D. Don<br>RW-710      | Polygonaceae | Margosh<br>chontal | H | R  | Intestinal worms both human and cattle, constipation, hair and cloth coloring, forage.                   | 1.5  | 60 | 0.41 | Po,<br>De | Or/E  | 1●2■3●4●5●6●7<br>●8●9●10●11●12<br>●13■14● |
| <i>Rheum webbianum</i> Wall.<br>RW-711         | Polygonaceae | Chontal            | H | R  | Hair coloring, blood purifier, stomachic, dyspepsia, tonic for goat, sheep, forage.                      | 0.87 | 17 | 0.11 | Po, J     | To/Or | 1●2●3●4●5●6●7<br>●8□9●10●11●12<br>●13●14● |
| <i>Rumex hastatus</i><br>D. Don<br>RW-716      | Polygonaceae | Chorki             | H | Wp | Forage, anti-poison, used for better digestion, anti-rusting.                                            | 0.90 | 29 | 0.19 | J         | Or    | 1■2●3●4■5●6●7<br>●8●9●10●11●12<br>●13●14● |
| <i>Rumex nepalensis</i><br>L.<br>RW-717        | Polygonaceae | Hubabol            | H | R  | Healing, respiratory disorders, extract used for bile reduction, remove worms from wounded sites, cough. | 2.28 | 47 | 0.32 | Po,<br>De | To/Or | 1■2■3■4■5●6●7<br>●8■9●10●11●12<br>●13●14■ |
| <i>Primula macrophylla</i> D.<br>Don<br>RW-705 | Primulaceae  | Mabera             | H | L  | Eye problem, tobacco, forage.                                                                            | 1.5  | 60 | 0.41 | Po        | Or    | 1●2●3●4□5●6●7<br>●8●9●10●11□12<br>●13●14● |
| <i>Adiantum</i>                                | Pteriudaceae | Simbul Char        | H | L  | Fever, diarrhea, forage.                                                                                 | 1.25 | 30 | 0.20 | Ex        | Or    | 1●2●3●4●5●6●7                             |

|                                                                      |               |                   |   |      |                                                                                                                                                |      |    |      |        |    |                                               |
|----------------------------------------------------------------------|---------------|-------------------|---|------|------------------------------------------------------------------------------------------------------------------------------------------------|------|----|------|--------|----|-----------------------------------------------|
| <i>raddianum</i> C.<br>Presl<br>IRW-646                              |               |                   |   |      |                                                                                                                                                |      |    |      |        |    | ●8●9●10●11●12<br>●13●14●                      |
| <i>Punica granatum</i><br>L.<br>RW-708                               | Punicaceae    | Danoi             | T | F    | Exocarp for kidney stone,<br>urinary infection, intestinal<br>worms, cough, edible fruit,<br>increases blood, fruit have<br>high market value. | 1.30 | 49 | 0.33 | Po, di | Or | 1●2●3●4□5■6■7<br>■8●9■10□11■12<br>●13●14●     |
| <i>Aconitum</i><br><i>heterophyllum</i><br>Wall. ex Royle<br>/RW-645 | Ranunculaceae | Patrees           | H | R, F | Reduce bile, headache, cold<br>fever, cleans digestive tract,<br>forage, sold in market with<br>high price.                                    | 3.11 | 79 | 0.54 | Po     | Or | 1●2■3●4●5●6●7<br>●8●<br>9●10●11●12●13<br>●14● |
| <i>Delphinium</i><br><i>brunonianum</i><br>Royle<br>RW-668           | Ranunculaceae | Saboonay<br>tokay | H | F    | Coolant, arthritis, asthma,<br>backbone ache, forage.                                                                                          | 0.2  | 7  | 0.04 | De     | Or | 1●2●3●4□5●6●7<br>●8●9■10●11●12<br>●13■14●     |
| <i>Salix tetrasperma</i><br>Roxb.<br>RW-720                          | Ranunculaceae | Bayo              | T | Wp   | Anti-diarrheal, reduce tonsils,<br>forage, maswak.                                                                                             | 0.71 | 27 | 0.18 | De     | Or | 1■2■3■4●5●6●7<br>●8●9●10●11●12<br>●13●14●     |

|                                                                   |          |          |   |     |                                                                                                                      |      |    |      |           |    |                                           |
|-------------------------------------------------------------------|----------|----------|---|-----|----------------------------------------------------------------------------------------------------------------------|------|----|------|-----------|----|-------------------------------------------|
| <i>Fragaria nubicola</i> (Lindl. Ex Hoof.f.)<br>Lacaita<br>RW-676 | Rosaceae | Bursay   | H | F   | Wild fruit, forage                                                                                                   | 0.22 | 20 | 0.13 | Di        | Or | 1●2■3●4●5●6●7<br>●8●9●10●11●12<br>●13●14● |
| <i>Malus domestica</i><br>Borkh.<br>RW-687                        | Rosaceae | Palo     | T | F   | Blood purification, Edible, health tonic, fruit is being sold as source of income in market.                         | 1.12 | 33 | 0.22 | Di        | Or | 1●2●3●4●5●6●7<br>●8●9●10●11●12<br>●13●14● |
| <i>Prunus amygdalus</i> L.<br>RW-706                              | Rosaceae | Badam    | T | S   | Kushta jaat, increases blood, eyesight, skin care, lactagogue, brain tonic, energizer, fruit have high market value. | 1.21 | 39 | 0.26 | Di,<br>Po | Or | 1●2●3●4●5●6●7<br>●8■9●10□11●12<br>●13●14● |
| <i>Prunus armeniaca</i> L.<br>RW-707                              | Rosaceae | Joi/Jein | T | F,S | Diarrhea, cough, edible, fruit have high market value.                                                               | 0.9  | 36 | 0.24 | Di, J     | Or | 1●2●3●4■5■6●7<br>□8●9□10■11●12<br>●13●14● |
| <i>Prunus persica</i> L.<br>RW-725                                | Rosaceae | Aaro     | T | S   | Seed coat used for eye problem, fruit edible                                                                         | 0.33 | 16 | 0.10 | SC        | E  | 1●2●3●4●5●6●7<br>●8●9●10●11●12            |

|                                              |               |                      |    |            |                                                                                               |      |    |      |    |      |                                               |
|----------------------------------------------|---------------|----------------------|----|------------|-----------------------------------------------------------------------------------------------|------|----|------|----|------|-----------------------------------------------|
|                                              |               |                      |    |            |                                                                                               |      |    |      |    |      | ●13●14●                                       |
| <i>Rosa webbiana</i><br>Wall.<br>RW-714      | Rosaceae      | Shengai              | Sh | R, B,<br>F | Reduce blood pressure,<br>decrease extra blood, tea,<br>edible fruit, forage, dying<br>cloth. | 1    | 46 | 0.31 | De | Or   | 1●2●3■4■5●6●7<br>●8●<br>9□10●11■12●13<br>●14● |
| <i>Rubus ulmifolius</i><br>Schott<br>RW-715  | Rosaceae      | Ounchi               | H  | F          | Hepatitis, Edible.                                                                            | 0.42 | 10 | 0.06 | Di | Or   | 1●2●3●4●5●6●<br>7●8●9●10●<br>11●12●13●14●     |
| <i>Spiraea canesens</i><br>D. Don<br>/RW-724 | Rosaceae      | Darai                | Sh | B          | Skin care, delivery, forage,<br>making sticks.                                                | 0.6  | 31 | 0.21 | P  | E    | 1●2●3●4□5●6●7<br>●8●9●10□11●12<br>●13●14●     |
| <i>Salix acmophylla</i><br>Boiss.<br>RW-718  | Salicaceae    | Biyao                | T  | L          | Diarrhea, sweet latex on<br>leavereduce extra blood, pot<br>making, thatching.                | 0.44 | 17 | 0.11 | Ex | Or   | 1●2●3●45●5●6●<br>7●8●9●10■11●1<br>2●13●14●    |
| <i>Salix alba</i> L.<br>RW-719               | Salicaceae    | Machor/mori<br>bayao | T  | L, St      | Leaves use as forage,<br>persistent fever, anti-<br>diarrheal, pot making.                    | 1    | 39 | 0.26 | J  | Or   | 1□2■3●4■5●6●7<br>●8■9●10●11●12<br>●13●14●     |
| <i>Bergenia stracheyi</i>                    | Saxifragaceae | koret/Sabsar         | H  | R          | Tuberculosis, backache,<br>healing, reduce infertility,                                       | 3.71 | 75 | 0.51 | Po | E/Or | 1●2□3■4■5●6●7<br>●8□9●10●11●12                |

|                                           |                  |               |    |             |                                                                             |      |    |      |              |      |                                           |
|-------------------------------------------|------------------|---------------|----|-------------|-----------------------------------------------------------------------------|------|----|------|--------------|------|-------------------------------------------|
| (Hook.f. & Thomson) Engl.<br>RW-657       |                  |               |    |             | stomachic, diarrhea, burns, arthritis, inflammation.                        |      |    |      |              |      | ●13□14●                                   |
| <i>Pedicularis bicornuta</i> L.<br>RW-694 | Scrophulariaceae | Unknown       | H  | L           | General body pain, stomachic, sedative, forage.                             | 0.4  | 7  | 0.04 | De           | Or   | 1●2●3●4●5●6●7<br>●8●9●10●11●12<br>●13●14● |
| <i>Pedicularis flava</i> Pall.<br>RW-695  | Scrophulariaceae | Qaziban       | H  | L           | Asthma, forage.                                                             | 0.37 | 20 | 0.13 | De           | Or   | 1●2●3●4●5●6●7<br>●8●9●10●11●12<br>●13●14● |
| <i>Verbascum thapsus</i> L.<br>RW-730     | Scrophulariaceae | Tonch         | H  | St, L       | Blood purifier or oxygenation, forage.                                      | 0.5  | 6  | 0.04 | Di           | Or   | 1●2■3■4●5●6●7<br>●8●9●10●11●12<br>●13●14● |
| <i>Datura stramonium</i> L.<br>RW-667     | Solanaceae       | Tandouro      | H  | S, Fl,<br>L | Anti dandruf, tooth ache, ear ache, boils, remove worms from wounded sites. | 2.64 | 43 | 0.29 | Po, J,<br>Pa | Or/E | 1□2●3■4□5■6●7<br>●8□9●10●11●12<br>●13●14□ |
| <i>Daphne mucronata</i> Royle<br>RW-666   | Thymelaeaceae    | Nick          | Sh | F, L        | Eye problem, toothache, break big stones.                                   | 0.8  | 41 | 0.28 | Di,<br>Ex    | Or   | 1●2●3●4□5●6■7<br>■8●9●10□11●12<br>●13●14● |
| <i>Foeniculum</i>                         | Umbelliferae     | Nerlay gizari | H  | F           | Eyesight, Aromatic,                                                         | 0.62 | 30 | 0.20 | De           | Or   | 1●2●3●4●5●6□7                             |

|                                         |                |             |    |      |                                                                                                                                                                                                   |      |    |      |       |    |                                           |
|-----------------------------------------|----------------|-------------|----|------|---------------------------------------------------------------------------------------------------------------------------------------------------------------------------------------------------|------|----|------|-------|----|-------------------------------------------|
| <i>vulgare</i> Mill.<br>RW-675          |                |             |    |      | Carminative, stomachic,<br>digestive, forage.                                                                                                                                                     |      |    |      |       |    | □8●9□10●11●12<br>●13●14●                  |
| <i>Urtica dioica</i> L.<br>RW-729       | Urticaceae     | Jomi        | H  | L    | Arthritis, swollen parts,<br>nausea, vegetable.                                                                                                                                                   | 1.5  | 35 | 0.23 | Pa, J | Or | 1●2□3■4■5●6●7<br>●8●9●10●11●12<br>●13●14■ |
| <i>Viola pilosa</i><br>Blume<br>/RW-731 | Violaceae      | Lilio       | H  | F, L | Cough, anti-diarrheal, fever,<br>used for blood reduction,<br>pneumonia, edible, asthma,<br>constipation, stomachic,<br>forage.                                                                   | 0.5  | 12 | 0.08 | Po    | Or | 1●2●3●4●5●6●7<br>●8●9●10●11●12<br>●13●14● |
| <i>Vitis vinifera</i> L.<br>RW-732      | Vitaceae       | Kasheelzach | WC | F    | Kidney stone, produce blood,<br>constipation, cough,<br>smoking, improve urine<br>muscle, remove intestinal<br>worms, hair coloration leaves<br>use for forage, fruit has high<br>economic value. | 1.30 | 49 | 0.33 | Po, J | O  | 1●2●3●4●5●6●7<br>●8●9●10●11●12<br>●13●14● |
| <i>Tribulus<br/>terrestris</i> L.       | Zygophyllaceae | Kunay       | H  | F    | Pimples, menses, blood<br>pressure, kidney stone.                                                                                                                                                 | 0.88 | 31 | 0.21 | Pa    | To | 1●2●3□4□5□6●7<br>●8●9■10●11●12            |



|        |  |  |  |  |  |  |  |  |  |  |  |  |         |
|--------|--|--|--|--|--|--|--|--|--|--|--|--|---------|
| RW-728 |  |  |  |  |  |  |  |  |  |  |  |  | ●13●14■ |
|--------|--|--|--|--|--|--|--|--|--|--|--|--|---------|

233

234 L=leaf, R=root, B=bark, S=shoot, St=Stem, F=Fruit, Fl=Flower, La=latex, G=gum, Wp=whole plant, C=cone, Pa=paste, P=poultice, Po=Powder, De=Decoction,

235 In=infusion. As=ash, Fu=fume, Di=Direct, Ex=extract, Sa=saag, J=juice, Sh=shrub, H=herb, T=tree, WC=woody climber E=external, Or=oral, To=topical, In=inhalation,

236 SC= seed coat, RW=Rawalpindi, □=Reported with similar Use, ■=Reported with dissimilar use, ●=Not Reported, **FC**=Frequency of Citation, **RFC**=Relative Frequency of

237 Citation, **UV**=Use Value,**UVI**=Use Value Index.

238 **1**=[46]; **2**=[29] **3**=[47] **4**=[48] **5**=[49]; **6**=[50];**7**=[51]; **8**=[52]; **9**=[53]; **10**=[54]; **11**=[17, 55]; **12**=[56]; **13**=[57]; **14**=[58].

239

240

241

242 **Fig. 5.** Use categories of plants

243

244 **Fig. 6.** Dominant life forms of medicinal plants

245

246 **Fig. 7.** Plant parts used in traditional medicine

247

248

249 **Fig. 8.** Percent distribution of different herbal preparations

250

251 **Fig. 9.** Most common ailments treated with medicinal plant species

252

253

254 **Fig. 10.** Mode of administration of herbal preparations

255

256 Thirty-one out of 90 plant species were reported for the first time in this study, either with  
257 new uses (28 plants) or new report (3 plants). The newly reported medicinal plant species to  
258 the world of ethnobotany include *Allium gilgitensis*, *Astragalus gilgitensis* and *Pedicularia*  
259 *flava*. The new ethnomedicinal data was compared with the previous studies from the  
260 neighboring areas of district Diamir and other countries. A variety of studies [48]; [50]; [51];  
261 [53]; [17]; [54]; [49]; [46]; [58]; [52]; [29]; [47] indicated that 32.2% of the medicinal plants  
262 were reported for the first time from Fairy Meadow Gilgit Baltistan with similar  
263 ethnomedicinal uses as reported from other areas, whereas 57.7% medicinal plants had  
264 dissimilar uses. *Adiantum raddianum* was reported to cure scabies by [59], while the same

265 species in our study was used for fever, diarrhea, and as forage. *Anacyclus pyrethrum* species  
266 was reported from Jordan to cure colitis (colon inflammation) [60] , while in this study it was  
267 used for sore throat, eye wash, toothache and forage. Similarly, *Asparagus officinalis* was  
268 reported as used for common cold, cough, and influenza by [60], while uses in our study  
269 included anti-inflammatory, ant-diabetic, anti-oxidant, digestive, anti-cancer, maintenance of  
270 blood glucose level, and as forage. The comparative details (reported and novel uses) of all  
271 31 plants species are given in **Table 3**.

272 Table 3

273 Medicinal Plants with novel and already reported uses

| Scientific Name              | Novel reports                                                                                             | Already reported uses                                            | References                                      |
|------------------------------|-----------------------------------------------------------------------------------------------------------|------------------------------------------------------------------|-------------------------------------------------|
| <i>Adiantum raddianum</i>    | Fever, diarrhea, forage.                                                                                  | Plant extract is applied on the surface of body to cure scabies. | [59]<br>Reported from India.                    |
| <i>Allium gilgitensis</i>    | Pain, headache, vegetable, forage.                                                                        |                                                                  |                                                 |
| <i>Anacyclus pyrethrum</i>   | Sore throat, eye wash, toothache and forage.                                                              | Stem is used to cure colitis (colon inflammation).               | [60]<br>From Jordon                             |
| <i>Artemisia glacialis</i>   | Diarrhea, nausea, intestinal worms, helpful in pregnancy.                                                 | Aerial parts used as digestive                                   | [61]<br>From Varaita valley,<br>Piedmont, Itlay |
| <i>Asparagus officinalis</i> | Anti-inflammatory, diabetes, anti-oxidant, digestive, anti-cancer, maintains blood glucose level, forage. | common cold, cough, influenza                                    | [60]<br>From Jordon.                            |
| <i>Aster himalaicus</i>      | Stomachic, aromatic, forage.                                                                              | Root decoction is used for dysentery                             | [62]<br>Gilgit Baltistan, Pakistan              |

|                               |                                                                              |                                                                                                                                                                                          |                                        |
|-------------------------------|------------------------------------------------------------------------------|------------------------------------------------------------------------------------------------------------------------------------------------------------------------------------------|----------------------------------------|
| <i>Astragalus gilgitensis</i> | Digestive, Forage.                                                           | ----                                                                                                                                                                                     | ----                                   |
| <i>Bistorta vivipara</i>      | Fruit edible, throat infection, root for piles, forage.                      | Fried seeds are used in checking blood dysentery                                                                                                                                         | [63].<br>From Nepal                    |
| <i>Cicer microphyllum</i>     | Fruit edible, forage.                                                        | Whole plant is used for increasing milk production and as general tonic for cows.                                                                                                        | [64]<br>From Gilgit<br>Baltistan       |
| <i>Equisetum hyemale</i>      | Kidney problems, skin and mouth dryness, forage.                             | Nutrients in the plant may cause skin, hair, teeth and nails to become stronger. Used as ingredient of shampoo, soap and skin care products. Also, used to boost milk production in cow. | Telkes, 2011.<br>From America          |
| <i>Ficus palmata</i>          | Asthma, Obstruction in liver and spleen, latex used for blisters and healing | Fruit edible, leaves as fodder and wood used for fuel, fruit paste used in ringworm and skin diseases.                                                                                   | [65].<br>[66].<br>[67].<br>From Nepal. |

|                          |                                                                                          |                                                                                                                                                                                                                                                  |                                     |
|--------------------------|------------------------------------------------------------------------------------------|--------------------------------------------------------------------------------------------------------------------------------------------------------------------------------------------------------------------------------------------------|-------------------------------------|
|                          |                                                                                          | The fruit is demulcent, emollient, laxative and poultice. It is used as a part of the diet in the treatment of constipation and diseases of the lungs and bladder. The latex of the plant is used to take out spines lodged deeply in the flesh. | [68].<br>From Pakistan              |
|                          |                                                                                          | Latex is applied to heal wounds and cuts                                                                                                                                                                                                         | [69].<br>From India                 |
| <i>Gentiana kurroo</i>   | Healing of wounds, removal of dead cells, boils, headache, cold, fever, malaria, forage. | Roots are dried to make powder and taken along desi ghee for Stomachache.                                                                                                                                                                        | [70].<br>Pakistan                   |
|                          |                                                                                          | Skin disease, leprosy, leucoderma, constipation                                                                                                                                                                                                  | [62].<br>Gilgit Baltistan, Pakistan |
| <i>Geranium pratense</i> | After delivery to reduce abdominal pain, backache, forage and milk                       | These plants are used for internal and external wounds, swellings,                                                                                                                                                                               | [64].<br>From Gilgit Baltistan      |

|                             |                                                                                                               |                                                                                                                                                   |                                                          |
|-----------------------------|---------------------------------------------------------------------------------------------------------------|---------------------------------------------------------------------------------------------------------------------------------------------------|----------------------------------------------------------|
|                             | production in cattle.                                                                                         | inflammations, tumors, bleeding, uterus problems and nerve problems.                                                                              |                                                          |
| <i>Gnaphalium spp.</i>      | Constipation, menses, sciatica, forage.                                                                       | Aerial parts used for hypertension and ulcers.                                                                                                    | [71].<br>From China                                      |
| <i>Hylotelephium ewersi</i> | Constipation, Stomachic.                                                                                      | Aerial parts used as appetizer                                                                                                                    | [57].<br>Gilgit Baltistan, Pakistan                      |
| <i>Limonium cabulicum</i>   | Asthma, pneumonia, tuberculosis, bleeding from gums, piles, thought to be used for thousand diseases, forage. | Fresh leaves boiled in water containing sugar and used as tea.                                                                                    | [72].<br>Thakht-e-Sulaiman Hills,<br>North-West Pakistan |
| <i>Malus domestica</i>      | Blood purification, Edible, health tonic, financially important as fruit sold in market.                      | Decoction with <i>Ficus carica</i> pseudofruits, aerial parts of <i>Malva sylvestris</i> and <i>Verbascum thapsus</i> leaves used as antitussive. | [73].<br>From Italy.                                     |
|                             |                                                                                                               | Tea for common cold and cough.                                                                                                                    | [74].<br>From Bosnia                                     |

|                              |                                                                                             |                                                                                                                                                                                                          |                                |
|------------------------------|---------------------------------------------------------------------------------------------|----------------------------------------------------------------------------------------------------------------------------------------------------------------------------------------------------------|--------------------------------|
| <i>Pedicularis bicornata</i> | General body pain, stomachic, sedative, forage.                                             | Leaf juice used to stop bleeding of cuts.                                                                                                                                                                | [69].<br>From India            |
| <i>Pedicularis flava</i>     | Asthma, forage.                                                                             | ----                                                                                                                                                                                                     | ----                           |
| <i>Pedicularis pectinate</i> | Stomachic, cardiac, forage.                                                                 | Pounded leaves are given for haemoptysis.                                                                                                                                                                | [75].<br>From North Kashmir    |
| <i>Picea smithiana</i>       | Gum is used for Asthma, diarrhea, tuberculosis, diabetes, joint broken pots, hair removing. | Resin is used for joining different things as well as used for heart problems. Wood is a chief source of timber and fuel                                                                                 | [54].<br>From Gilgit Baltistan |
| <i>Prunus persica</i>        | Seed coat used for eye problem, fruit edible                                                | The dried fruits and ginger are crushed into powder. This powder is mixed with honey and eaten for body cooling and diabetes. The resin is boiled in water, cool down and used for earache and deafness. | [68].<br>From Pakistan         |



|                               |                                                                                                                                         |                                                                                                                                                 |                                      |
|-------------------------------|-----------------------------------------------------------------------------------------------------------------------------------------|-------------------------------------------------------------------------------------------------------------------------------------------------|--------------------------------------|
|                               |                                                                                                                                         | Seed oil used in massage for warmth during extreme cold season.                                                                                 | [69].<br>From India                  |
| <i>Quercus incana</i>         | Furniture, cattle forage, fuel wood, thatching, wood/timber sold in market.                                                             | Fruits is used as astringent, diuretic, diarrhea and asthma.                                                                                    | [68].<br>From Pakistan               |
| <i>Rheum webbianum</i>        | Hair coloring, blood purifier, stomachic, dyspepsia, tonic for goat, sheep, forage.                                                     | Roots crushed, and paste applied on wounds and cuts                                                                                             | Nautiyal et al., 2008.<br>From India |
| <i>Rubus ulmifolius</i>       | Hepatitis, Edible.                                                                                                                      | Fruits are edible and carminative. Unripe fruit are used as tonic and aphrodisiac. Roots and leaves are used for the treatment f skin diseases. | [69].<br>From Pakistan               |
| <i>Saussurea gossypiphora</i> | Asthma, pneumonia, stomach problem, flue, headache, improve circulation, menstrual cycle, decoction used to expelumbilical cord easily. | Flower is used for fever                                                                                                                        | [76].<br>From India                  |

|                        |                                                                                                                                                                                             |                                                                                                                          |                                         |
|------------------------|---------------------------------------------------------------------------------------------------------------------------------------------------------------------------------------------|--------------------------------------------------------------------------------------------------------------------------|-----------------------------------------|
| <i>Silene vulgaris</i> | Cattle forage, intestinal worms, kidney problem.                                                                                                                                            | Aerial parts used for female disorders.                                                                                  | [74].<br>From Bosnia                    |
|                        |                                                                                                                                                                                             | Leaves juice used as Ophthalmia, stomachic, emollient.                                                                   | [62].<br>Gilgit Baltistan, Pakistan     |
| <i>Viola pilosa</i>    | Cough, anti-diarrheal, fever, maintains the blood in body in normal range, pneumonia, edible, asthma, constipation, stomachic, forage.                                                      | Used as expectorant.                                                                                                     | [74].<br>From Bosnia.                   |
|                        |                                                                                                                                                                                             | Fresh flowers are boiled in water and decoction is prepared. The decoction is used as tea to cure fever, cough and cold. | [77].<br>Western Himalaya, Chota Bangal |
| <i>Vitis vinifera</i>  | Kidney stone, produce blood, constipation, cough, smoking, improve urine muscle, remove intestinal worms, hair coloration leaves use for forage, fruit is sold in market for financial aid. | General weakness. Fruit is used for abdominal inflammation.                                                              | [60]<br>From Jordon.                    |
|                        |                                                                                                                                                                                             | Tea for blood purification, renal and bladder ailments.                                                                  | [74].<br>From Bosnia                    |

|                                   |                                                                             |                                                                                                                                                                                                                                                                                                                                                                                                                                                                                                                |                                |
|-----------------------------------|-----------------------------------------------------------------------------|----------------------------------------------------------------------------------------------------------------------------------------------------------------------------------------------------------------------------------------------------------------------------------------------------------------------------------------------------------------------------------------------------------------------------------------------------------------------------------------------------------------|--------------------------------|
| <p><i>Xanthium stramonium</i></p> | <p>Swelling, boils.</p>                                                     | <p>Fruit is demulcent and cooling, used in small pox. Leaves decoction is recommended in long standing malarial fever. An infusion of the plant has been used in the treatment of rheumatism, diseased kidneys and tuberculosis. A decoction of the root has been used in the treatment of high fevers and to help a woman expel the afterbirth. A decoction of the seeds has been used in the treatment of bladder complaints. A poultice of the powdered seed has been applied as a salve on open sores.</p> | <p>[68].<br/>From Pakistan</p> |
| <p><i>Zea mays</i></p>            | <p>Paste applied on swelling parts, blisters, as food, fodder, economic</p> | <p>Tea for blood purification, renal and bladder ailments</p>                                                                                                                                                                                                                                                                                                                                                                                                                                                  | <p>[74].<br/>From Bosnia</p>   |

|  |  |                                                                                                                                       |                                |     |
|--|--|---------------------------------------------------------------------------------------------------------------------------------------|--------------------------------|-----|
|  |  | Maize is the second chief source of food and straw and its grain is also used medicinally for dysentery, jaundice and cough problems. | [54].<br>From Gilgit Baltistan | 274 |
|--|--|---------------------------------------------------------------------------------------------------------------------------------------|--------------------------------|-----|

## 275 **Quantitative analysis of the data**

### 276 **Use value**

277 Quantitative data about the use value of medicinally important plants were obtained calculating  
278 the relative importance of these species in the community. The use values ranged from 5.473 for  
279 *Berberis lyceum* to 0.125 for *Pedicularis pectinata*. The use values of the remaining plants were  
280 distributed between these two extreme values. Details of all the medicinal plants along with use  
281 values are given in **Table 2**. The higher use values might be attributed to the common  
282 distribution of medicinal plants and their use awareness of the inhabitants [55] [42].

283

### 284 **Relative frequency of citation**

285 Relative frequency of citation indicates the local importance of each species with reference to  
286 informants who mentioned these medicinal plant species. The RFC values of all 90 plant species  
287 varied from 0.96 for *Berberis lyceum* to 0.03 for *Aster himalaicus* (**Fig. 11 Table 2**).

288

### 289 **Fig. 11. Relative Frequency of Citation of different plants**

290

291 The comparatively higher RFC values may be due to easy availability of the respective plant,  
292 wide range of distribution, and frequent/multiple uses. The current results were in contradiction  
293 to [78] for most of the plant species in common. The contradiction can be attributed to the  
294 developmental difference of the study areas and cultural differences. The medicinal plants with  
295 high RFC might be interesting for pharmacological, biological evaluation for the validation of  
296 traditional knowledge [79]. Based upon the results, the interesting medicinal plants might be  
297 subjected to phytochemical screening in the quest of new drugs candidates.

298

299 **Fig. 12.** Association between Relative Frequency of Citation and Use Value

300

### 301 **Pearson correlation coefficient**

302 The Pearson Correlation Coefficient is used to find out the nature of linear relationship between  
303 RFC and UV and its numerical value was found to be 0.836 (at P-value <1%). This relationship  
304 provides evidence of positive significant association between the local importance of each  
305 species and the relative importance of plants use. It reflects that greater the use of the species by  
306 the informants tends to increase the number of usable medicinal flora. If patterns across species  
307 were matching RFC and UV were positively correlated. However, the values of RFC and UV  
308 across some species were different. This variation across species was numerically calculated by  
309  $r^2$ , where by 70 % variations in RFC can be elaborated by that of UV. Thus, results suggest  
310 evincing strength among these two indices (**Table 4**). These results are further aided by a graph  
311 drawn in the shape of scattered plot giving positive relationship between RFC and UV (**Fig. 12**).

312

313 Table 4. Summary Stats for Relative Frequency of Citation (RFC) and Use Value (UV)

|                                                                           | <b>Mean</b> | <b>SD</b> | <b>Min</b> | <b>Max</b> |
|---------------------------------------------------------------------------|-------------|-----------|------------|------------|
| <b>RFC</b>                                                                | 0.267       | 0.1792    | 0.0342     | 0.965      |
| <b>UV</b>                                                                 | 1.384       | 1.208     | 0.125      | 5.47       |
| <b>Association between RFC and UV by Using Pearson Correlation Method</b> |             |           |            |            |
| <b>R</b>                                                                  | 0.836       |           |            |            |
| <b>r<sup>2</sup></b>                                                      | 0.699       |           |            |            |

314 **SD =Standard Deviation, Min =Minimum, Max =Maximum**

315

## 316 **Conclusions**

317 This study was a challenging adventure documenting valuable traditional knowledge left ignored  
318 by previous studies. The results obtained included new use reports for many plants and 3 new  
319 medicinal plants reported for the first time documented from Pakistan. This indicated that further  
320 studies are clearly needed. Further, the findings of this study can broaden the foundation of  
321 herbal medicines as well as pharmacology, pharmacy, phytochemistry inviting experimental  
322 studies for the validation of traditional and isolation of compounds of therapeutic importance for  
323 the development of new drugs against challenging and complex diseases like cancer.

324

## 325 **ACKNOWLEDGMENT**

326 The authors gratefully acknowledge local community of the study area for sharing their  
327 traditional medicinal knowledge.

328

## 329 **References**

330

331

332 1. Shinwari ZK, Qaiser M. Efforts on conservation and sustainable use of medicinal plants of  
333 Pakistan. Pak J Bot. 2011;43(1):5-10.

334 2. Rahman A. An Ethno-botanical investigation on Asteraceae family at Rajshahi, Bangladesh.  
335 Academia Journal of Medicinal Plants. 2013;1(5):92-100.

336 3. Ahmad H. Issues regarding medicinal plants of Pakistan. Udyana Today. 1999;6(3):6-7.

337 4. Khan A. The medicinal plants, their past and present, with special reference to the work being  
338 done in Pakistan. Pak J Forest. 1951;1:353-67.

339 5. Hamayun M. Ethnobotanical profile of Utror and Gabral valleys, district Swat, Pakistan.  
340 Ethnobotanical Leaflets. 2005;2005(1):9.

341 6. Stewart RR. Flora of West Pakistan: an annotated catalogue of the vascular plants of West  
342 Pakistan and Kashmir. Rawalpindi) xx, 1028p Map Geog. 1972;6.

343 7. Muhammad G, Khan MZ, Hussain MH, Iqbal Z, Iqbal M, Athar M. Ethnoveterinary practices of  
344 owners of pneumatic-cart pulling camels in Faisalabad City (Pakistan). Journal of Ethnopharmacology.  
345 2005;97(2):241-6.

346 8. Balick MJ. Transforming ethnobotany for the new millennium. Annals of the Missouri Botanical  
347 Garden. 1996:58-66.

348 9. Rehman K, Khan MA, Ullah Z, Chaudhary HJ. An ethno botanical perspective of traditional  
349 medicinal plants from the Khattak tribe of Chonthra Karak, Pakistan. Journal of ethnopharmacology.  
350 2015;165:251-9.

351 10. Ahmad H. People and plants-Pakistan: Capacity building in ethnobotany applied to conservation  
352 and sustainable use of plant resources. WWF-P Islamabad, Pakistan. 2004:76.



- 353 11. Ali S. Significance of flora with special reference to Pakistan. *Pak J Bot.* 2008;40(3):967-71.
- 354 12. Ali SI, Qaiser M. A phytogeographical analysis of the phanerogams of Pakistan and Kashmir.  
355 *Proceedings of the Royal Society of Edinburgh, Section B: Biological Sciences.* 1986;89:89-101.
- 356 13. Gilani SA, Qureshi RA, Farooq U. Ethnobotanical studies of Ayubia national park district  
357 Abbottabad, Pakistan. *Journal of Biological Sciences.* 2001;1(4):284-6.
- 358 14. Hazrat A, Nisar M, Shah J, Ahmad S. Ethnobotanical study of some elite plants belonging to Dir,  
359 Kohistan valley, Khyber Pukhtunkhwa, Pakistan. *Pak J Bot.* 2011;43(2):787-95.
- 360 15. Hussain F. The Ethnobotany of fruit plants and its role in the conservation and community  
361 development in Drosh valley, Chitral. HCC-OUP. 2003.
- 362 16. Ishtiaq M, Mumtaz AS, Hussain T, Ghani A. Medicinal plant diversity in the flora of Leepa Valley,  
363 Muzaffarabad (AJK), Pakistan. *African Journal of Biotechnology.* 2012;11(13):3087-98.
- 364 17. Khan A, Khan J. Market Survey of Useful Plants in the Mountain Region of Abbottabad District,  
365 Pakistan. *World Applied Sciences Journal.* 2011;14(4):510-3.
- 366 18. Khan SM. Plant communities and vegetation ecosystem services in the Naran Valley, Western  
367 Himalaya: University of Leicester; 2012.
- 368 19. Khattak NS, Nouroz F, Rahman IU, Noreen S. Ethno veterinary uses of medicinal plants of district  
369 Karak, Pakistan. *Journal of ethnopharmacology.* 2015;171:273-9.
- 370 20. Matin A, Khan MA, Ashraf M, Qureshi RA. Traditional use of herbs, shrubs and trees of Shogran  
371 valley, Mansehra, Pakistan. *Pak J Biol Sci.* 2001;4(9):1101-7.
- 372 21. Noor MJ, Kalsoom U. Ethnobotanical studies of selected plant species of Ratwal village, district  
373 Attock, Pakistan. *Pak J Bot.* 2011;43(2):781-6.
- 374 22. Qureshi R. Ethnobotany of Rohri Hills, Sindh, Pakistan. *Hamdard Medicus.* 2002;45(3):86-94.
- 375 23. Qureshi RA, Ahmed I, Ishtiaq M. Ethnobotanical and phytosociological studies of tehsil Gujjar  
376 Khan district Rawalpindi. *Asian J Plant Sci.* 2006;5(5):890-3.

- 377 24. Qureshi S, Khan M, Ahmad M. A survey of useful medicinal plants of Abbottabad in northern  
378 Pakistan. *Trakia Journal of Sciences*. 2008;6(4):39-51.
- 379 25. Shah GM, Jamal Z, Hussain M. Phytotherapy among the rural women of district Abbotabad. *Pak J*  
380 *Bot*. 2013;45:253-61.
- 381 26. Sher H, Ajaz M, Sher H. Sustainable utilization and economic development of some plant  
382 resources in Northern Pakistan. *Acta Botanica Yunnanica*. 2007;29(2):207.
- 383 27. Sher H, Hussain F. Ethnobotanical evaluation of some plant resources in Northern part of  
384 Pakistan. *African journal of Biotechnology*. 2009;8(17).
- 385 28. ul Haq I, Hussain M. Medicinal plants of Mansehra. *Hamdard Med*. 1993;36(3):63-100.
- 386 29. Shinwari ZK, Gilani SS. Sustainable harvest of medicinal plants at Bulashbar Nullah, Astore  
387 (northern Pakistan). *Journal of Ethnopharmacology*. 2003;84(2-3):289-98.
- 388 30. Bibi Y, Nisa S, Chaudhary FM, Zia M. Antibacterial activity of some selected medicinal plants of  
389 Pakistan. *BMC complementary and alternative medicine*. 2011;11(1):52.
- 390 31. Shinwari ZK, Salima M, Faisal R, Huda S, Asrar M. Biological screening of indigenous knowledge  
391 based plants used in diarrheal treatment. *Pak J Bot*. 2013;45(4):1375-82.
- 392 32. Umadevi M, Kumar KS, Bhowmik D, Duraivel S. Traditionally used anticancer herbs in India.  
393 *Journal of Medicinal Plants Studies*. 2013;1(3):56-74.
- 394 33. Khan SR. Micro case study and action plan for fairy meadows: International Centre for  
395 Integrated Mountain Development; 1997.
- 396 34. Tardío J, Pardo-de-Santayana M. Cultural importance indices: a comparative analysis based on  
397 the useful wild plants of Southern Cantabria (Northern Spain). *Economic Botany*. 2008;62(1):24-39.
- 398 35. Vitalini S, Iriti M, Puricelli C, Ciuchi D, Segale A, Fico G. Traditional knowledge on medicinal and  
399 food plants used in Val San Giacomo (Sondrio, Italy)—An alpine ethnobotanical study. *Journal of*  
400 *Ethnopharmacology*. 2013;145(2):517-29.

- 401 36. Phillips OL, Hall P, Gentry AH, Sawyer S, Vasquez R. Dynamics and species richness of tropical  
402 rain forests. *Proceedings of the National Academy of Sciences*. 1994;91(7):2805-9.
- 403 37. Ayyanar M, Ignacimuthu S. Traditional knowledge of kani tribals in Kouthalai of Tirunelveli hills,  
404 Tamil Nadu, India. *Journal of ethnopharmacology*. 2005;102(2):246-55.
- 405 38. Bano A, Ahmad M, Khan MA, Zafar M, Sultana S, Ullah Z. Pollen morphology of four endemic  
406 species of *Pedicularis* L. from alpine zone of the Deosai Plateau, Himalayan range. *Bangladesh Journal of*  
407 *Plant Taxonomy*. 2012;19(1):1.
- 408 39. Benítez G, González-Tejero M, Molero-Mesa J. Pharmaceutical ethnobotany in the western part  
409 of Granada province (southern Spain): Ethnopharmacological synthesis. *Journal of Ethnopharmacology*.  
410 2010;129(1):87-105.
- 411 40. Giday M, Asfaw Z, Woldu Z, Teklehaymanot T. Medicinal plant knowledge of the Bench ethnic  
412 group of Ethiopia: an ethnobotanical investigation. *Journal of Ethnobiology and Ethnomedicine*.  
413 2009;5(1):34.
- 414 41. Prabhu S, Vijayakumar S, Yabesh JM, Ravichandran K, Sakthivel B. Documentation and  
415 quantitative analysis of the local knowledge on medicinal plants in Kalrayan hills of Villupuram district,  
416 Tamil Nadu, India. *Journal of ethnopharmacology*. 2014;157:7-20.
- 417 42. Ullah S, Khan MR, Shah NA, Shah SA, Majid M, Farooq MA. Ethnomedicinal plant use value in the  
418 Lakki Marwat District of Pakistan. *Journal of ethnopharmacology*. 2014;158:412-22.
- 419 43. Yabesh JM, Prabhu S, Vijayakumar S. An ethnobotanical study of medicinal plants used by  
420 traditional healers in silent valley of Kerala, India. *Journal of ethnopharmacology*. 2014;154(3):774-89.
- 421 44. Ghorbani A. Studies on pharmaceutical ethnobotany in the region of Turkmen Sahra, north of  
422 Iran:(Part 1): General results. *Journal of ethnopharmacology*. 2005;102(1):58-68.
- 423 45. Wazir SM, Dasti AA, Shah J. Common medicinal plants of chapursan valley, Gojal II, Gilgit-  
424 Pakistan. *J Res (Science) Bahauddin Zakariya University, Multan, Pakistan*. 2004;15:41-3.

- 425 46. Qureshi R, Ghufraan M, Sultana K, Ashraf M, Khan A. Ethnomedicinal studies of medicinal plants  
426 of Gilgit District and surrounding areas. *Ethnobotany Research and Applications*. 2007;5:115-22.
- 427 47. Jabeen N, Ajaib M, Siddiqui MF, Ulfat M, Khan B. A survey of ethnobotanically important plants  
428 of district Ghizer, Gilgit-Baltistan. *FUUAST Journal of Biology*. 2015;5(1):153.
- 429 48. Abbas Q, Khan SW, Khatoon S, Hussain SA, Hassan S, Hussain A, et al. Floristic biodiversity and  
430 traditional uses of medicinal plants of Haramosh valley, Central Karakoram National Park of Gilgit  
431 district, Gilgit-Baltistan. *Pak J Bio Env Sci*. 2014;5:75-86.
- 432 49. Khan T, Khan IA, Rehman A, Alam J, Ali S. Exploration of near-extinct folk wisdom on medicinally  
433 important plants from Shinaki Valley Hunza, Pakistan. *International Journal of Biosciences*.  
434 2013;3(10):180-6.
- 435 50. Afzal S, Afzal N, Awan MR, Khan TS, Gilani A, Khanum R, et al. Ethno-botanical studies from  
436 Northern Pakistan. *J Ayub Med Coll Abbottabad*. 2009;21(1):52-7.
- 437 51. Awan MR, Jamal Z, Khan A. Ethno-botanical studies of economically important plants from  
438 mountainous region of Gilgit-Baltistan, Pakistan. *Sci Tech and Dev*. 2013;32:308-18.
- 439 52. Shedayi AA, Xu M, Gulraiz B. Traditional medicinal uses of plants in Gilgit-Baltistan, Pakistan.  
440 *Journal of Medicinal Plants Research*. 2014;8(30):992-1004.
- 441 53. Hussain I, Bano A, Ullah F. Traditional drug therapies from various medicinal plants of central  
442 karakoram national park, Gilgit-Baltistan Pakistan. *Pak J Bot*. 2011;43:79-84.
- 443 54. Khan SW, Khatoon S. Ethnobotanical studies on useful trees and shrubs of Haramosh and  
444 Bugrote valleys in Gilgit northern areas of Pakistan. *Pak J Bot*. 2007;39(3):699-710.
- 445 55. Khan B, Abdukadir A, Qureshi R, Mustafa G. Medicinal uses of plants by the inhabitants of  
446 Khunjerab National Park, Gilgit, Pakistan. *Pak J Bot*. 2011;43(5):2301-10.
- 447 56. Fahad S, Bano A. Ethnobotanical and physiological studies of some endangered plant species  
448 collected from two different altitudes in Gilgit Baltistan. *Pak J Bot*. 2012;44:165-70.

- 449 57. Bano A, Ahmad M, Zafar M, Sultana S, Rashid S, Khan MA. Ethnomedicinal knowledge of the  
450 most commonly used plants from Deosai Plateau, Western Himalayas, Gilgit Baltistan, Pakistan. *Journal*  
451 *of ethnopharmacology*. 2014;155(2):1046-52.
- 452 58. Shedayi AA, Gulshan B. Ethnomedicinal uses of plant resources in Gilgit-Baltistan of Pakistan.  
453 *Journal of Medicinal Plants Research*. 2012;6(29):4540-9.
- 454 59. De Britto J, Mahesh R. Evolutionary medicine of Kani Tribal's botanical knowledge in  
455 Agasthiayamalai Biosphere Reserve, South India. *Ethnobotanical Leaflets*. 2007;2007(1):31.
- 456 60. Afifi F, Abu-Irmaileh B. Herbal medicine in Jordan with special emphasis on less commonly used  
457 medicinal herbs. *Journal of Ethnopharmacology*. 2000;72(1-2):101-10.
- 458 61. Pieroni A, Giusti ME. Alpine ethnobotany in Italy: traditional knowledge of gastronomic and  
459 medicinal plants among the Occitans of the upper Varaita valley, Piedmont. *Journal of Ethnobiology and*  
460 *Ethnomedicine*. 2009;5(1):32.
- 461 62. Bano A, Ahmad M, Hadda TB, Saboor A, Sultana S, Zafar M, et al. Quantitative ethnomedicinal  
462 study of plants used in the skardu valley at high altitude of Karakoram-Himalayan range, Pakistan.  
463 *Journal of ethnobiology and ethnomedicine*. 2014;10(1):43.
- 464 63. JALAL JS, KUMAR P. SOME ETHNO-MEDICINAL PLANTS OF GORI RIVER BASIN, KUMAON  
465 HIMALAYA. *FLORA*. 2006;12(2):292-4.
- 466 64. Khan SW, Khatoon S. Ethnobotanical studies on some useful herbs of Haramosh and Bugrote  
467 valleys in Gilgit, northern areas of Pakistan. *Pakistan Journal of Botany*. 2008;40(1):43.
- 468 65. Thapa S. Documentation of traditional uses of plants by Tharu community around Royal Sukla-  
469 Phanta Wildlife Reserve, Far west Nepal. Central Department of Botany, Tribhuvan University,  
470 Kathmandu, Nepal. 2001:61.
- 471 66. Manandhar NP. *Plants and people of Nepal*: Timber press; 2002.

- 472 67. Pant S, Panta I. Indigenous knowledge on medicinal plants in Bhagawati Village Development  
473 Committee, Darchula, Nepal. *Botanica Orientalis: Journal of Plant Science*. 2007;4(1):79-81.
- 474 68. Haq F. The ethno botanical uses of medicinal plants of Allai Valley, Western Himalaya Pakistan.  
475 *International Journal of Plant Research*. 2012;2(1):21-34.
- 476 69. Nautiyal S, Maikhuri R, Rao K, Saxena K. Medicinal plant resources in Nanda Devi Biosphere  
477 Reserve in the central Himalayas. *Journal of herbs, spices & medicinal plants*. 2001;8(4):47-64.
- 478 70. Adnan M, Bibi R, Azizullah A, Andaleeb R, Mussarat S, Tariq A, et al. Ethnomedicinal plants used  
479 against common digestive problems. *African Journal of Traditional, Complementary and Alternative*  
480 *Medicines*. 2015;12(5):99-117.
- 481 71. Zheng X, Wang W, Piao H, Xu W, Shi H, Zhao C. The genus *Gnaphalium* L.(Compositae):  
482 phytochemical and pharmacological characteristics. *Molecules*. 2013;18(7):8298-318.
- 483 72. Ahmad K, Pieroni A. Folk knowledge of wild food plants among the tribal communities of  
484 Thakht-e-Sulaiman Hills, North-West Pakistan. *Journal of ethnobiology and ethnomedicine*.  
485 2016;12(1):17.
- 486 73. Pieroni A, Quave C, Nebel S, Heinrich M. Ethnopharmacy of the ethnic Albanians (Arbëreshë) of  
487 northern Basilicata, Italy. *Fitoterapia*. 2002;73(3):217-41.
- 488 74. Šarić-Kundalić B, Dobeš C, Klätte-Asselmeyer V, Saukel J. Ethnobotanical study on medicinal use  
489 of wild and cultivated plants in middle, south and west Bosnia and Herzegovina. *Journal of*  
490 *Ethnopharmacology*. 2010;131(1):33-55.
- 491 75. WAGAY N. ETHNOBOTANY FROM NORTH KASHMIR: A REVIEW. 2016.
- 492 76. Kala CP. Indigenous uses, population density, and conservation of threatened medicinal plants in  
493 protected areas of the Indian Himalayas. *Conservation Biology*. 2005;19(2):368-78.

- 494 77. Uniyal SK, Singh K, Jamwal P, Lal B. Traditional use of medicinal plants among the tribal  
495 communities of Chhota Bhangal, Western Himalaya. *Journal of ethnobiology and ethnomedicine*.  
496 2006;2(1):14.
- 497 78. Abbasi AM, Khan MA, Shah MH, Shah MM, Pervez A, Ahmad M. Ethnobotanical appraisal and  
498 cultural values of medicinally important wild edible vegetables of Lesser Himalayas-Pakistan. *Journal of*  
499 *ethnobiology and ethnomedicine*. 2013;9(1):66.
- 500 79. Mukherjee PK, Nema NK, Venkatesh P, Debnath PK. Changing scenario for promotion and  
501 development of Ayurveda—way forward. *Journal of ethnopharmacology*. 2012;143(2):424-34.

502

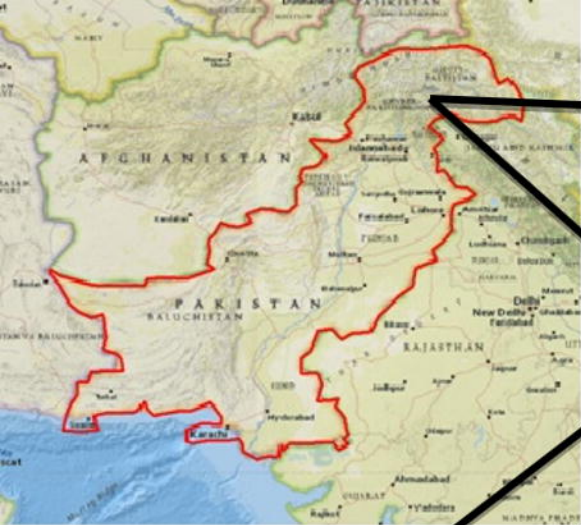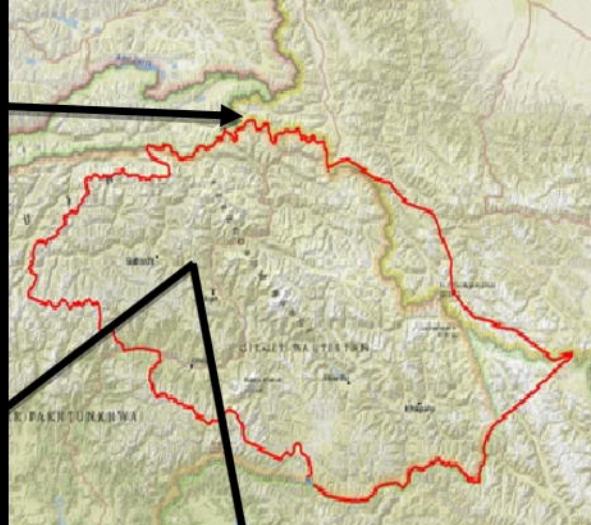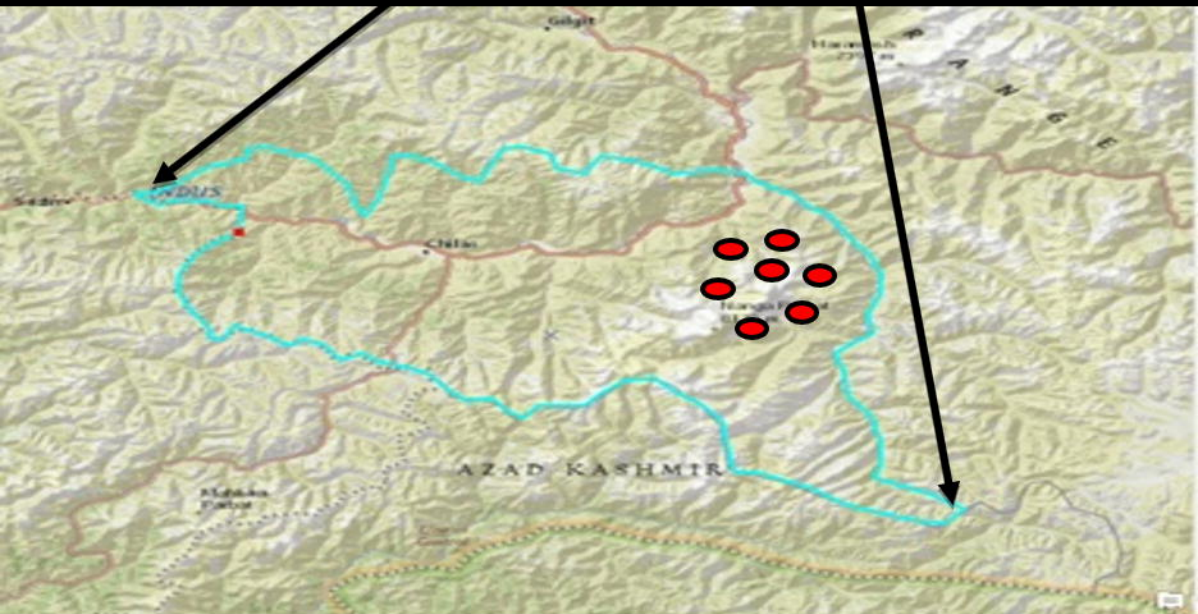



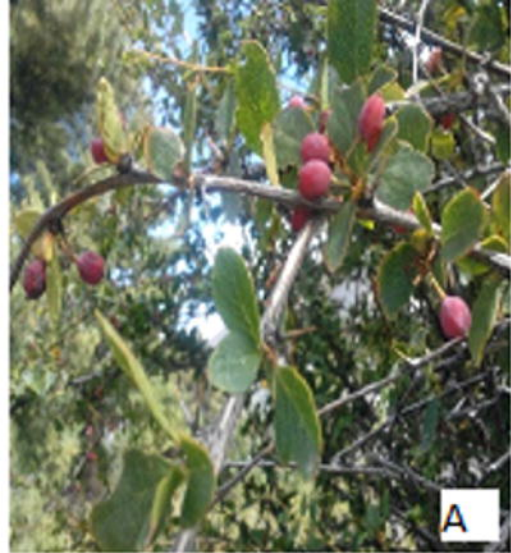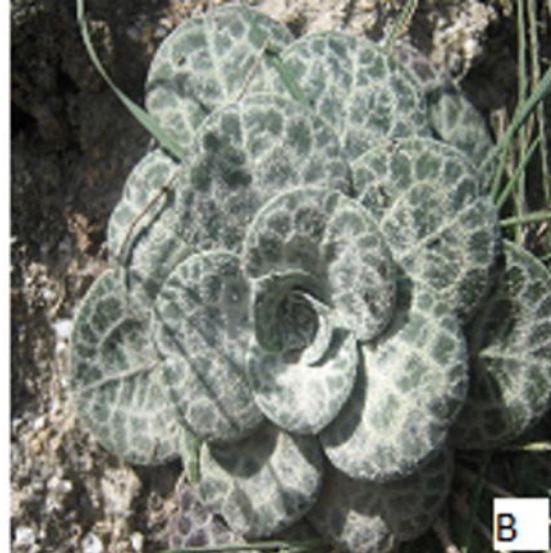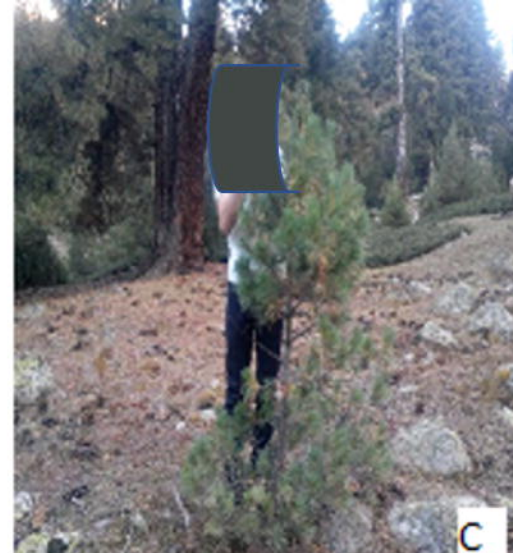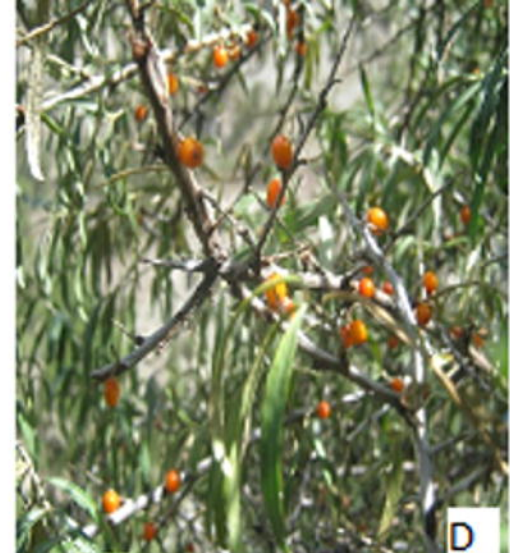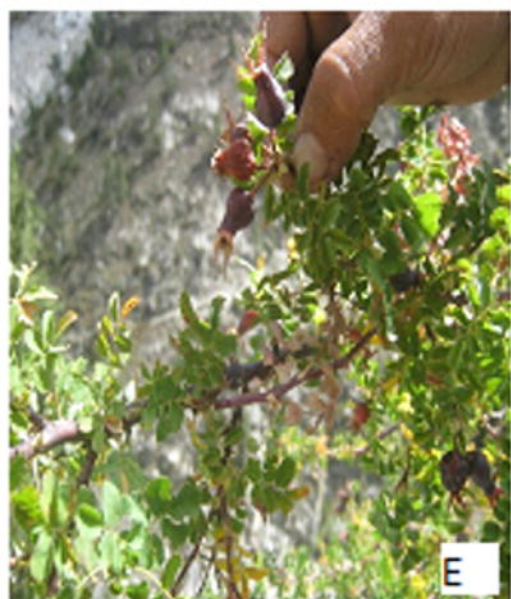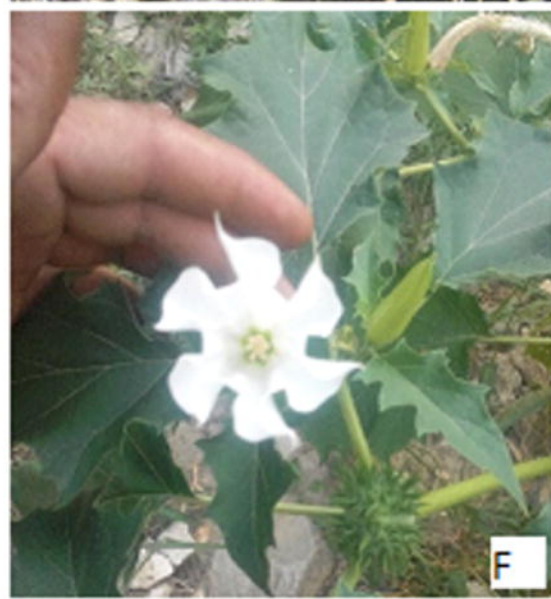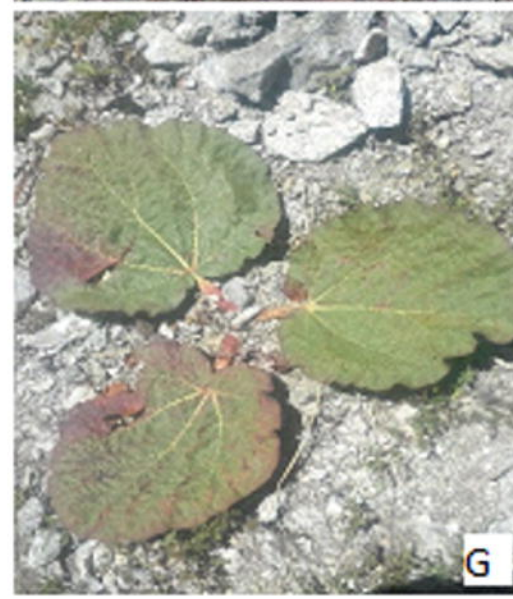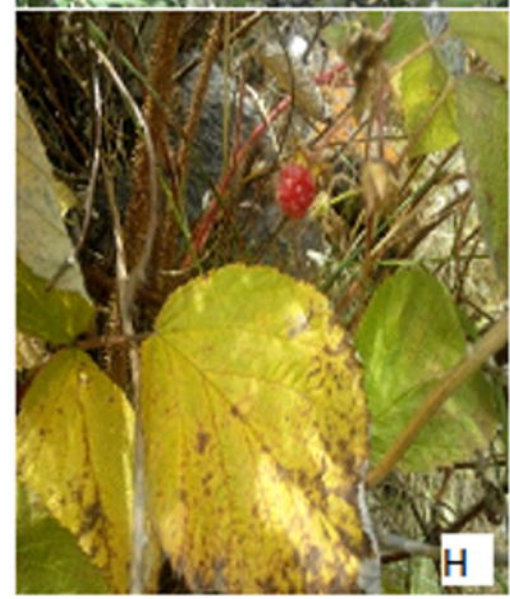

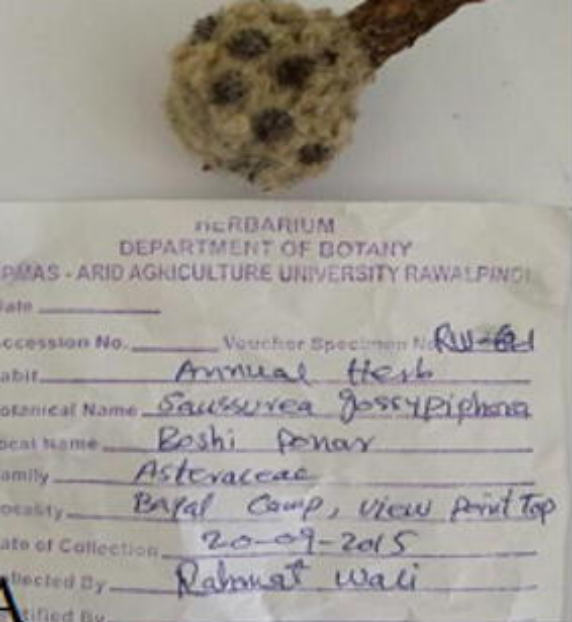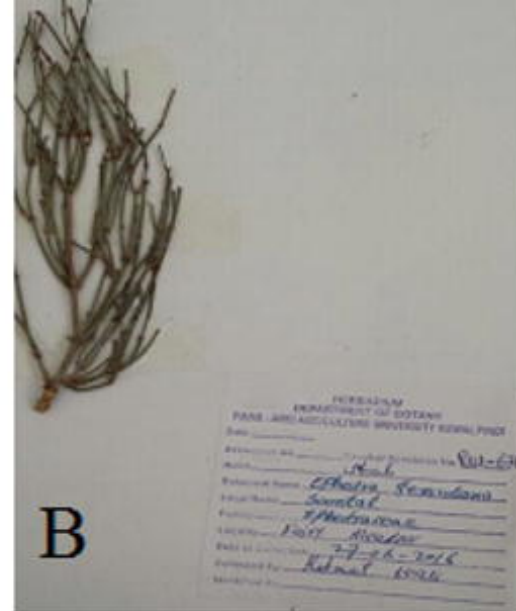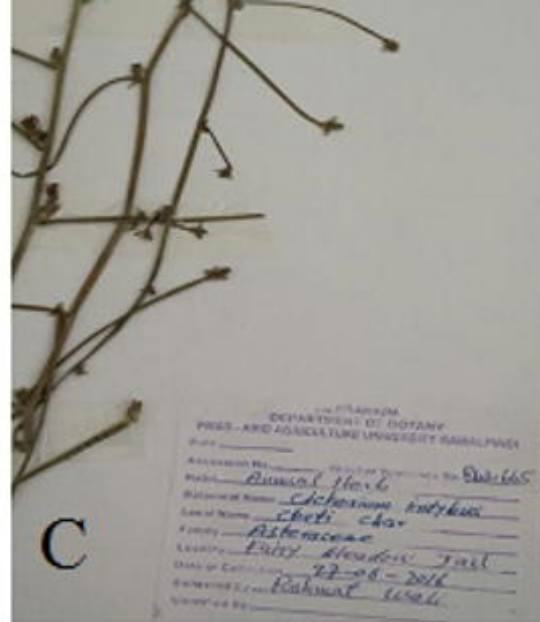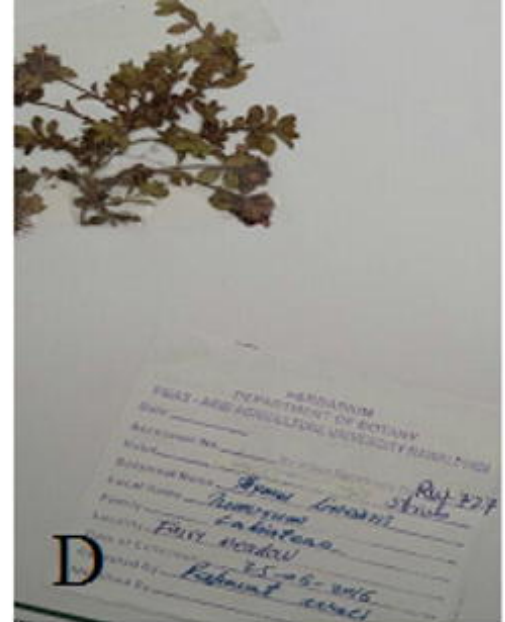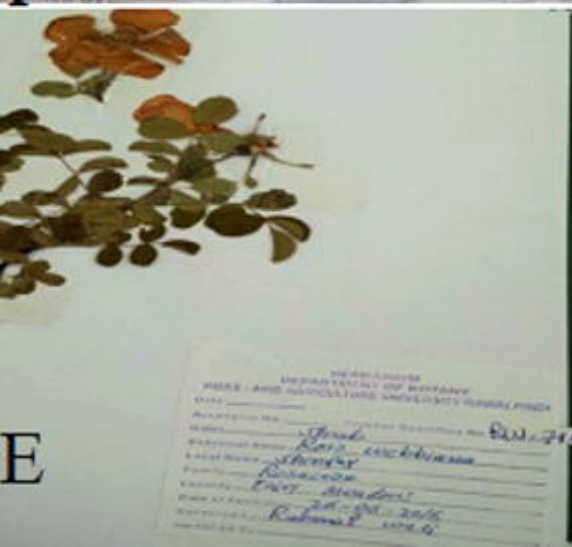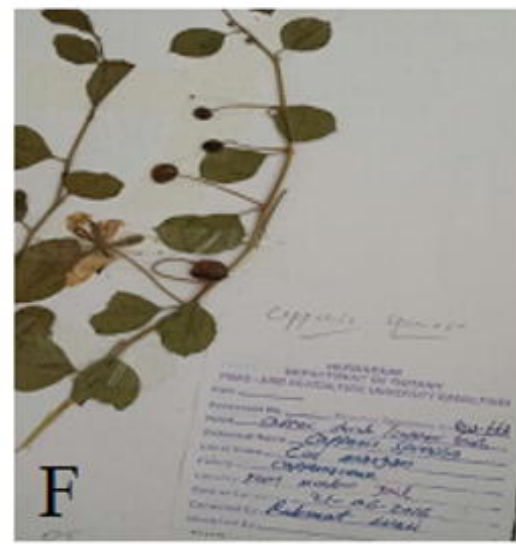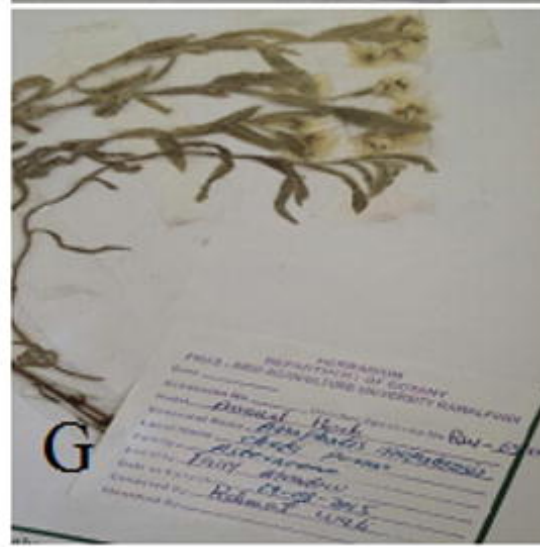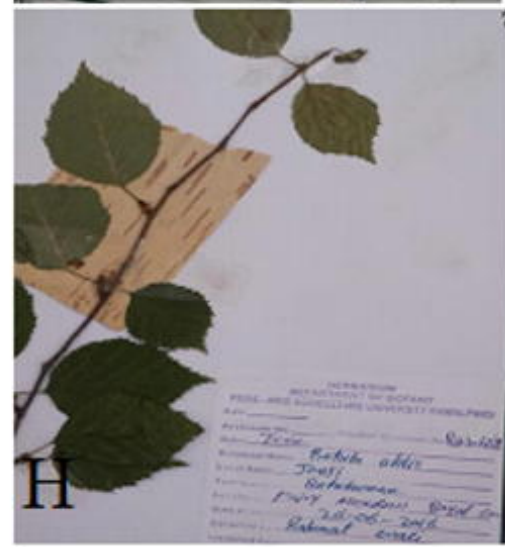

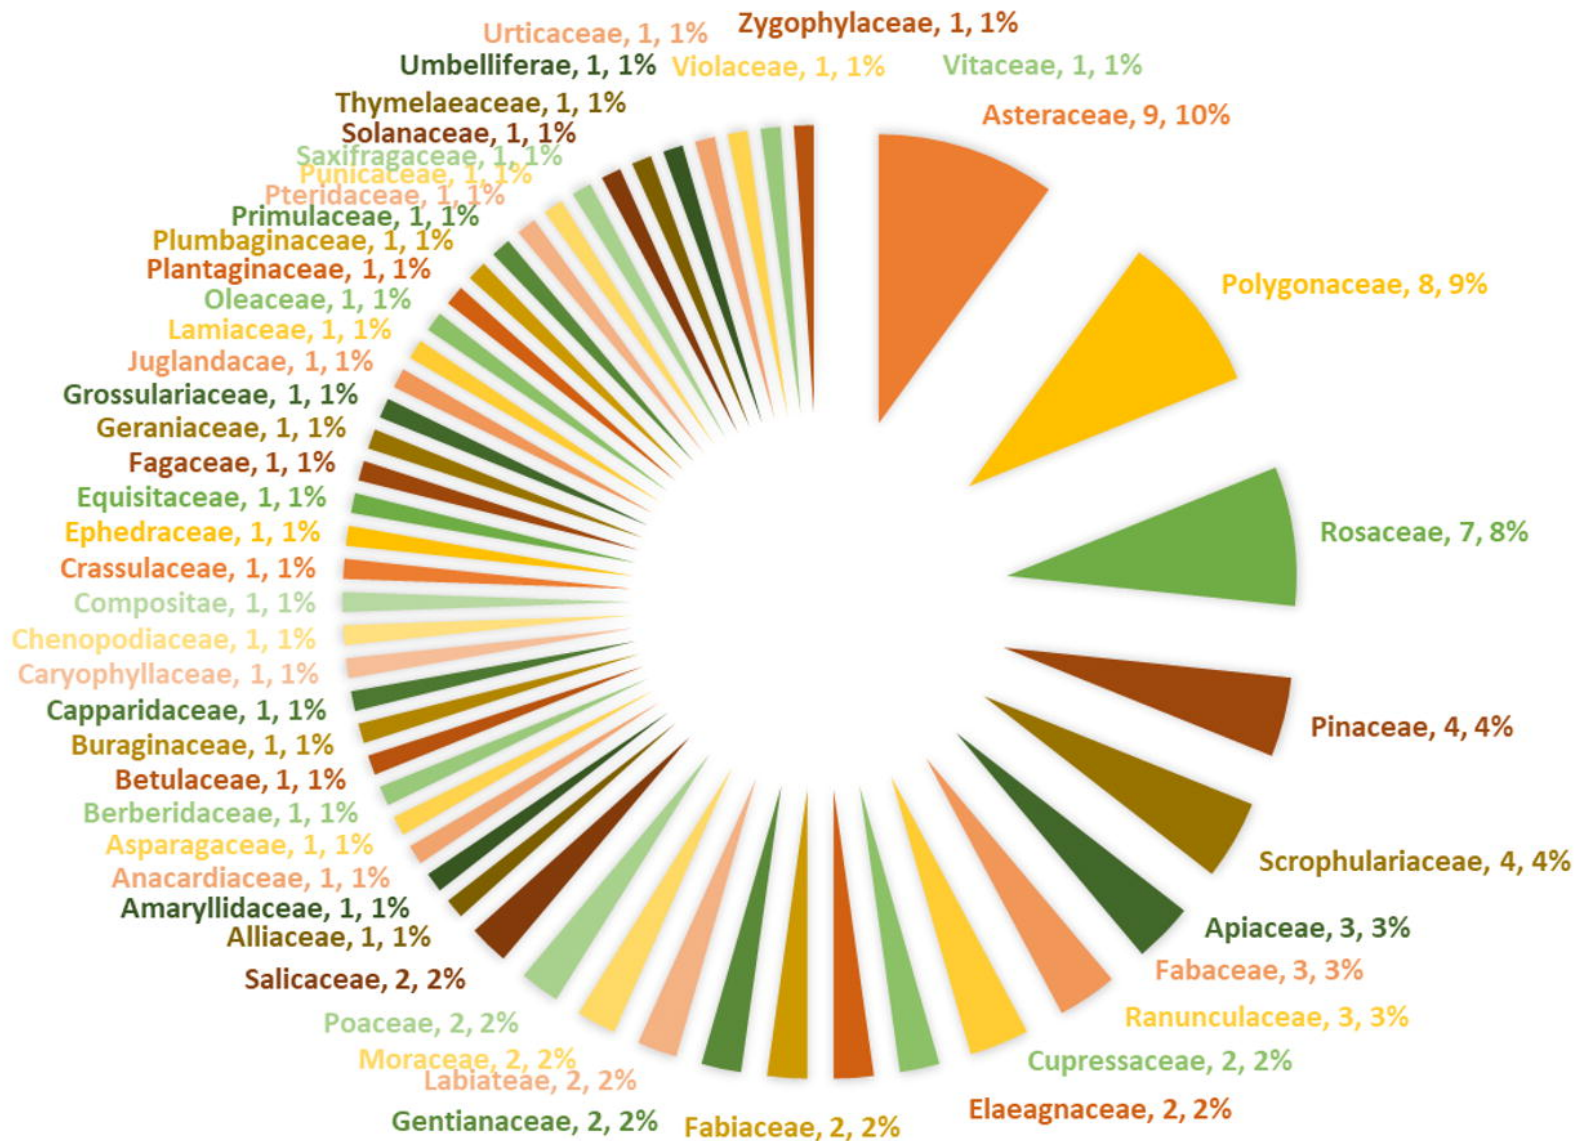

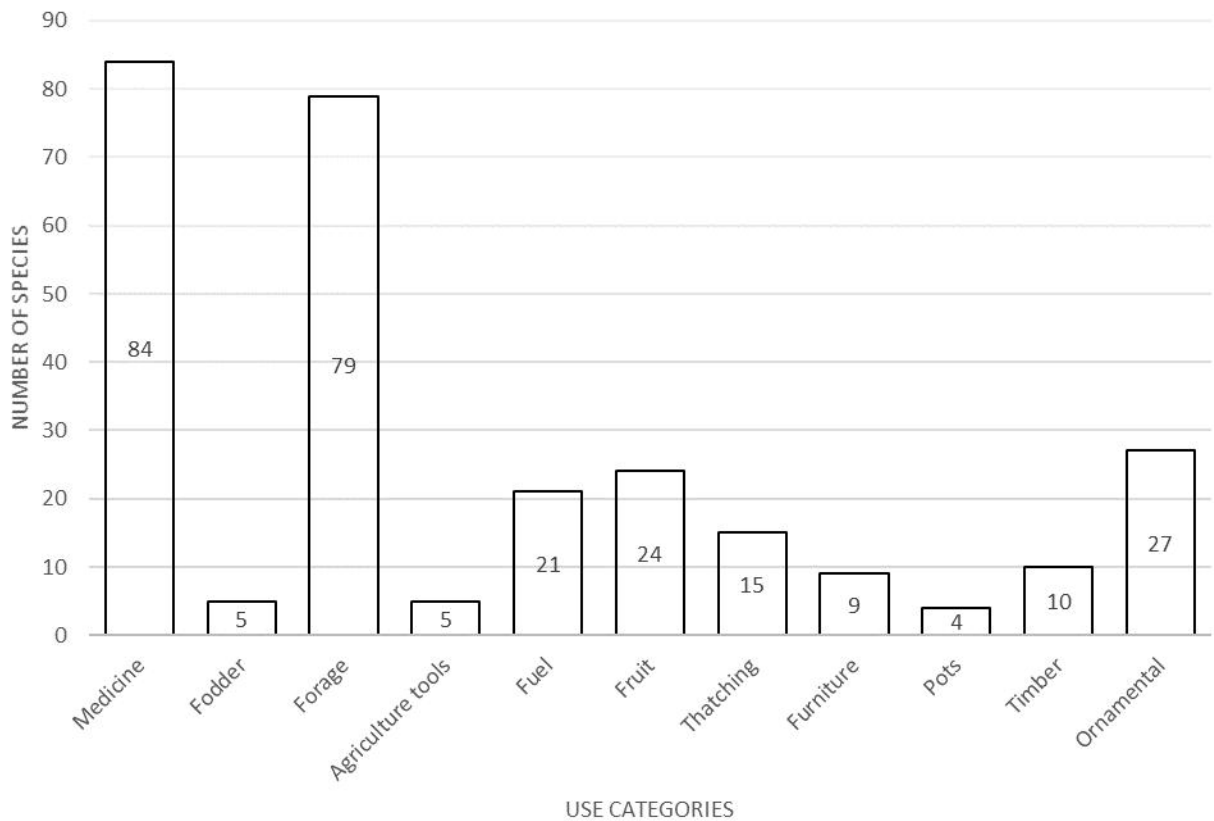

LIFE FORM

Woody climbers

Woody climbers

Shrubs

Shrubs

Trees

Trees

Herbs

Herbs

0

10

20

30

40

50

60

NO OF PLANTS PER LIFE FORM ( PERCENT VALUE)

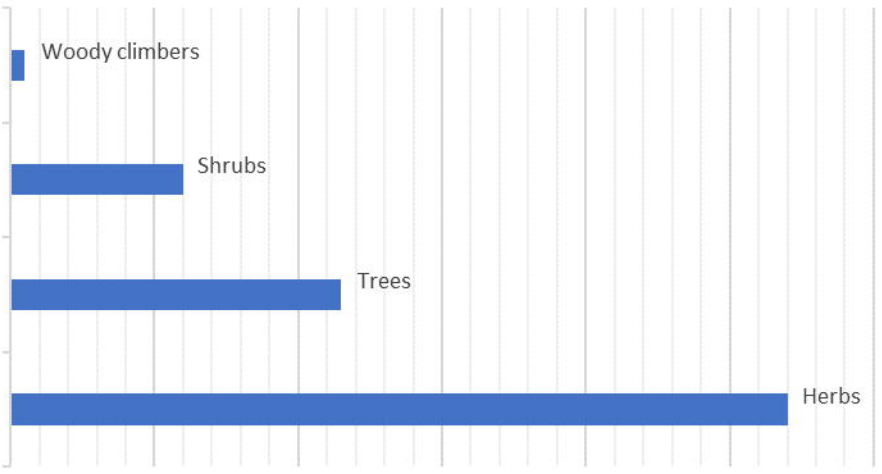

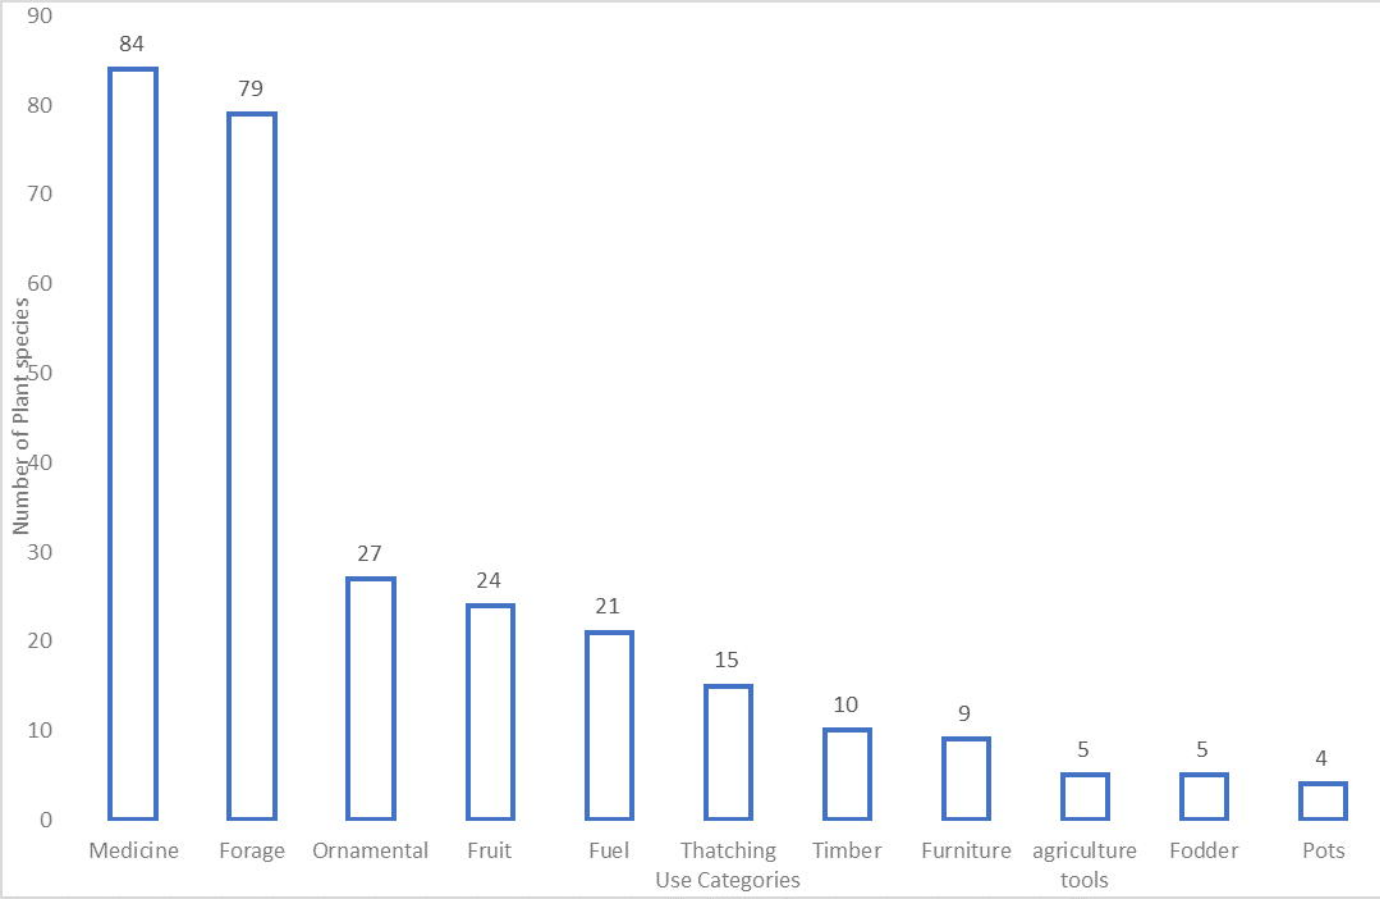

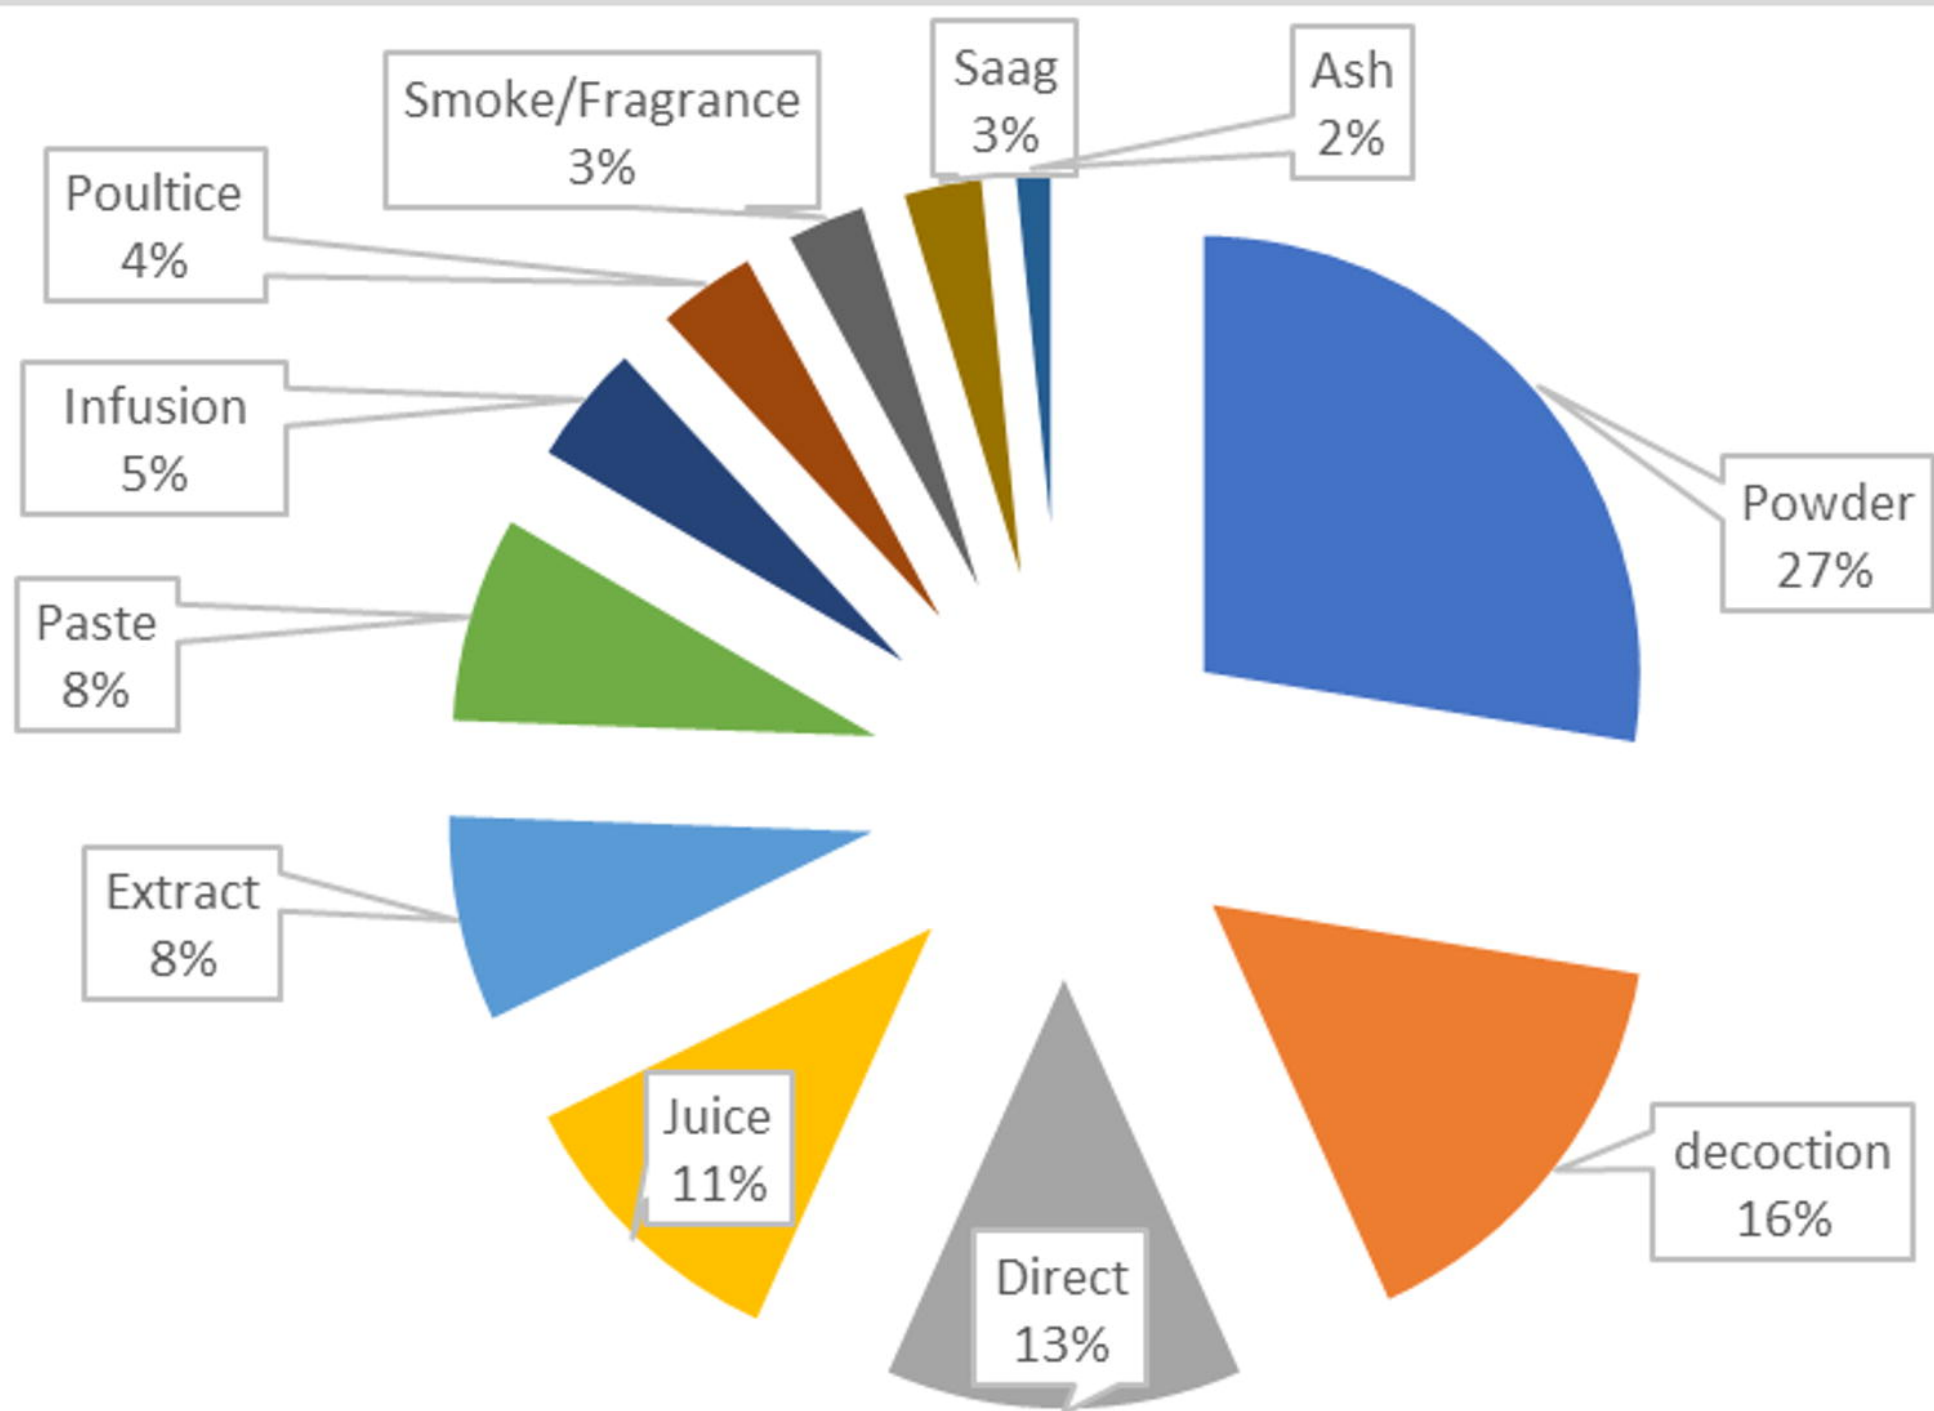

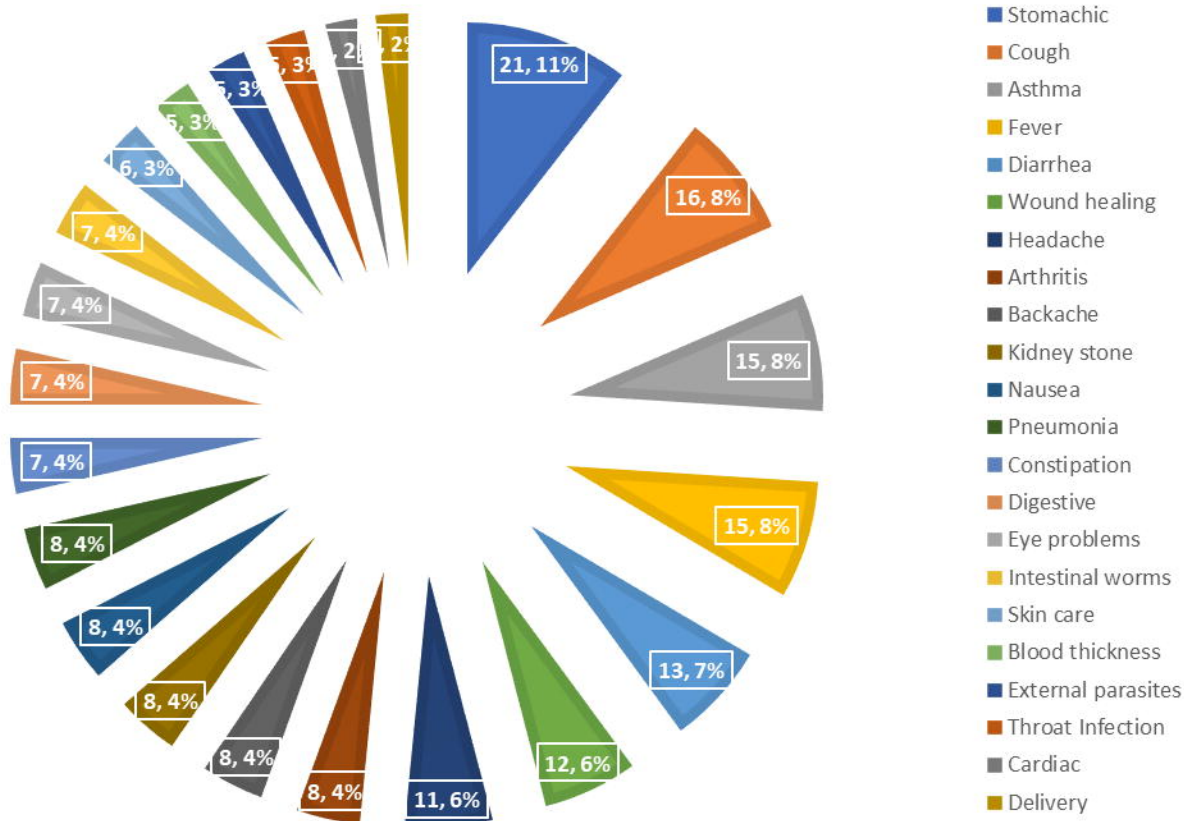



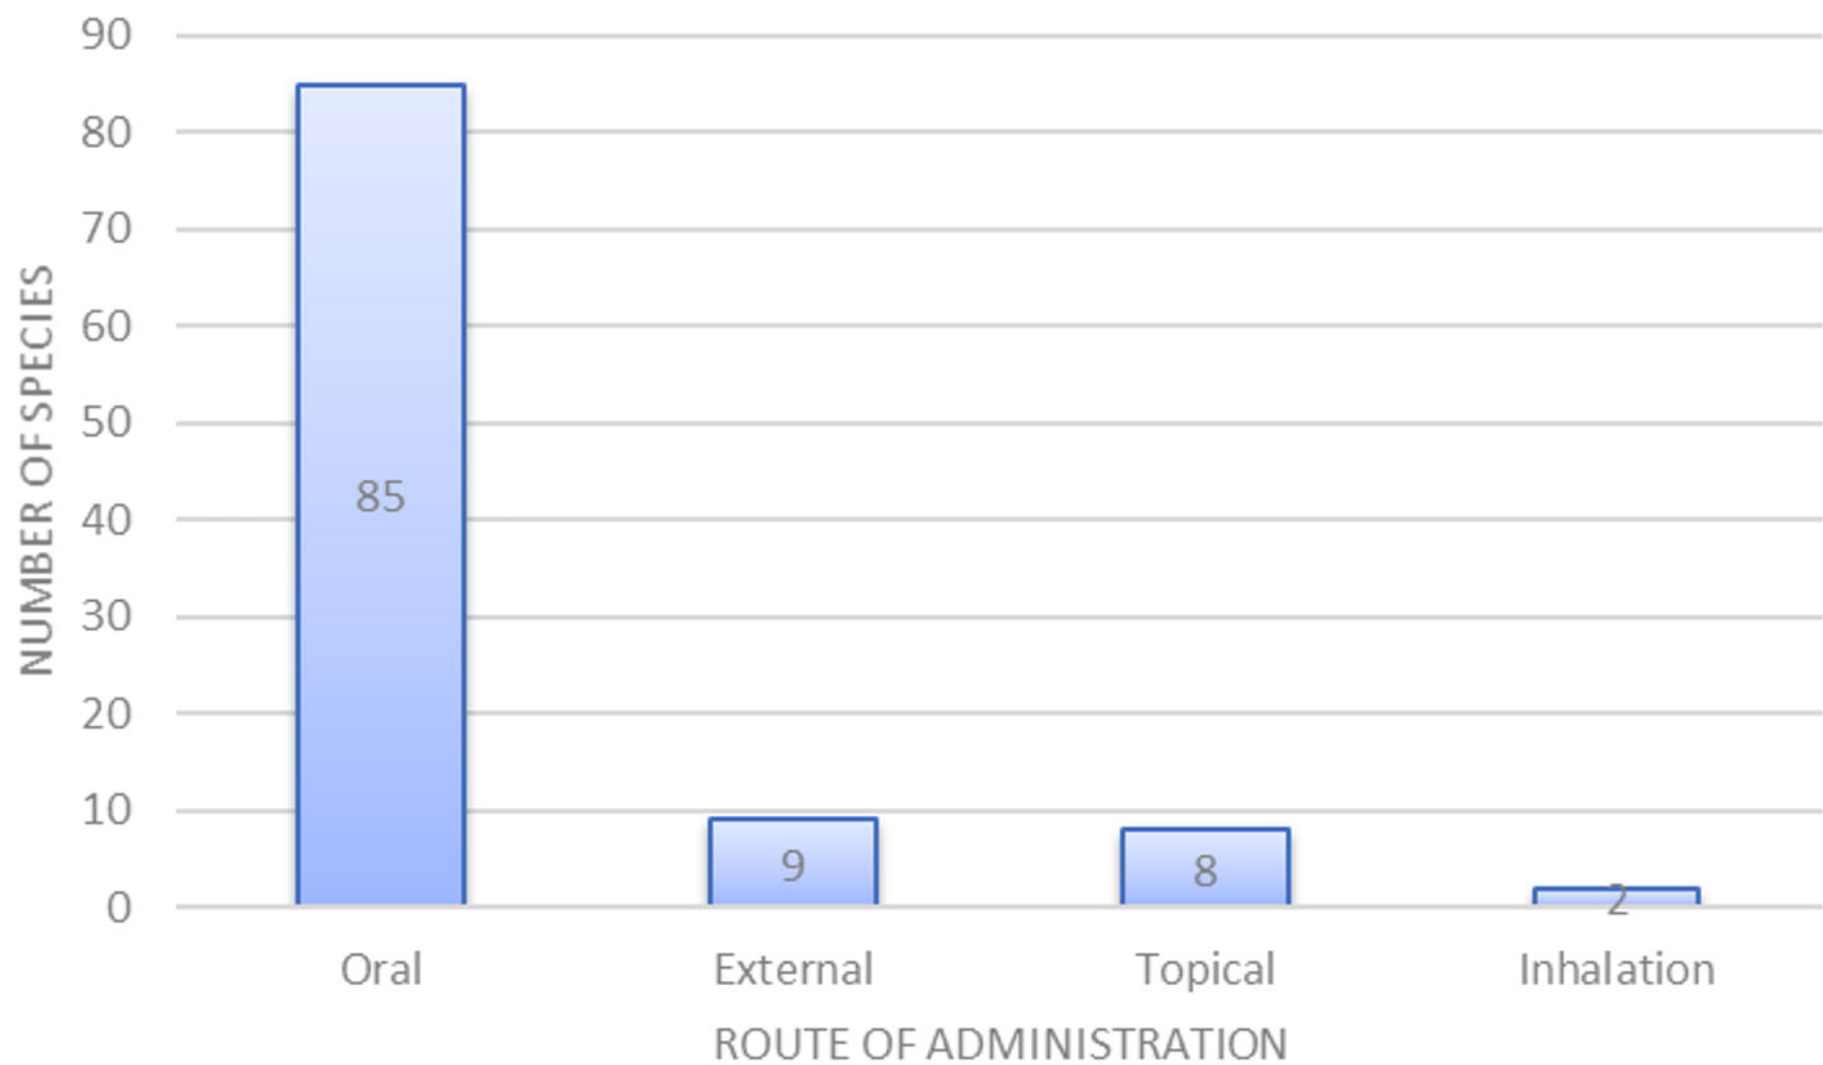

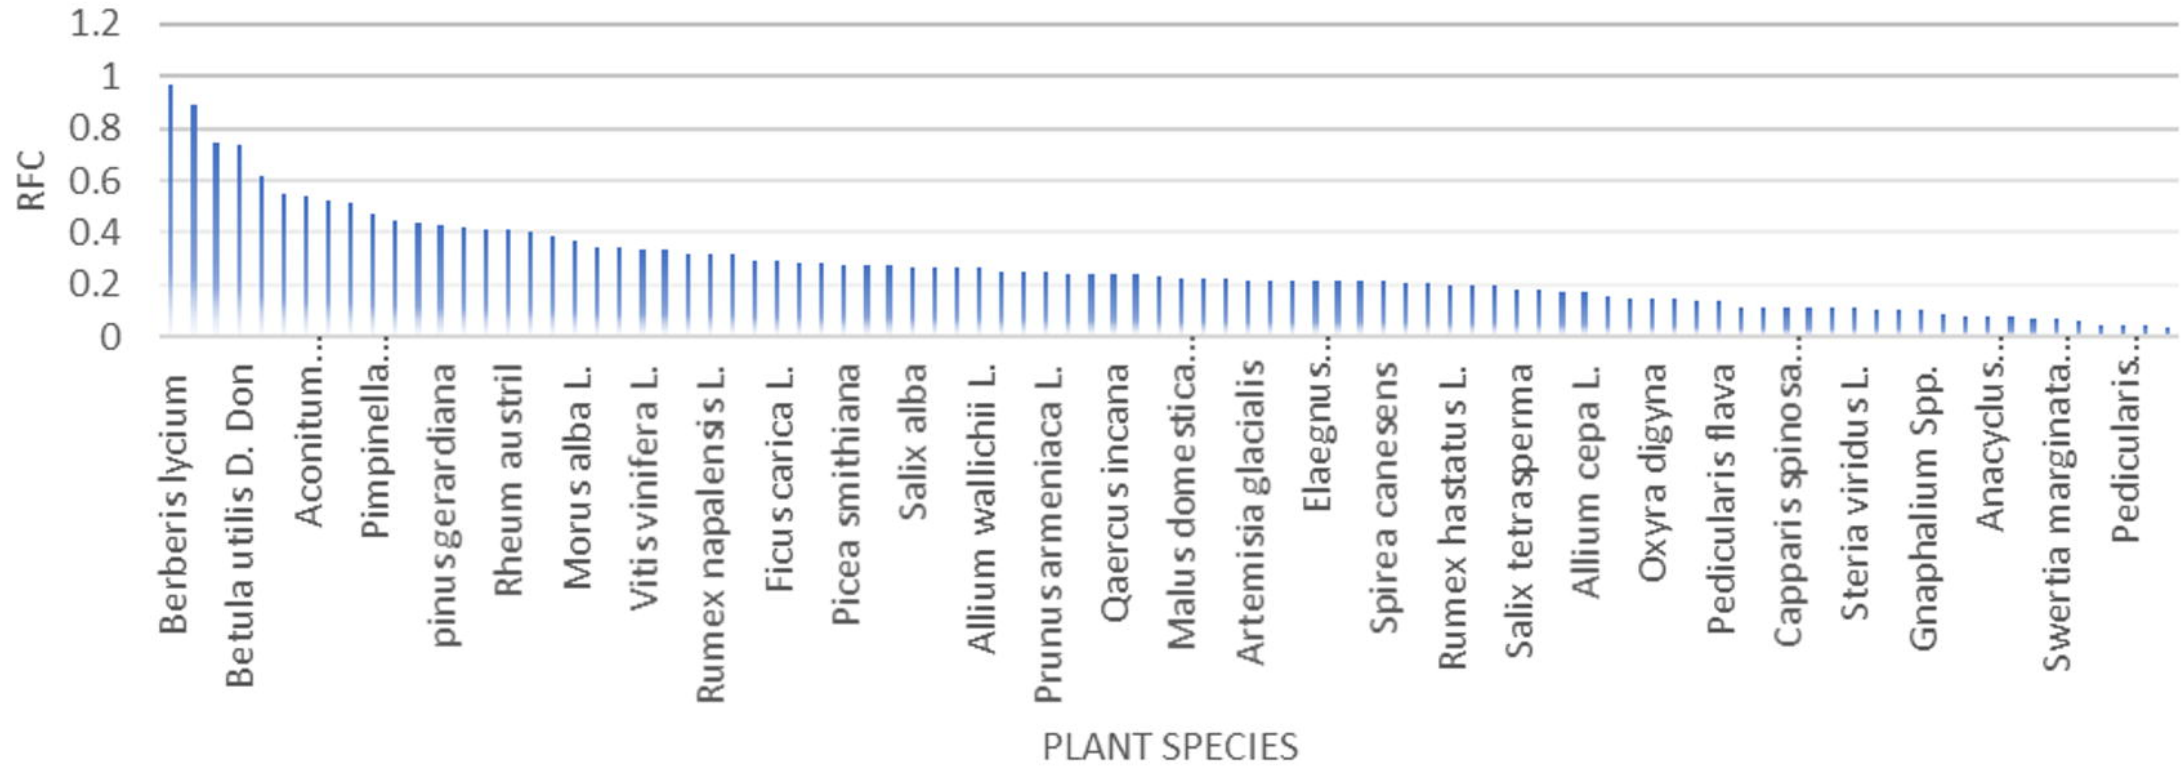

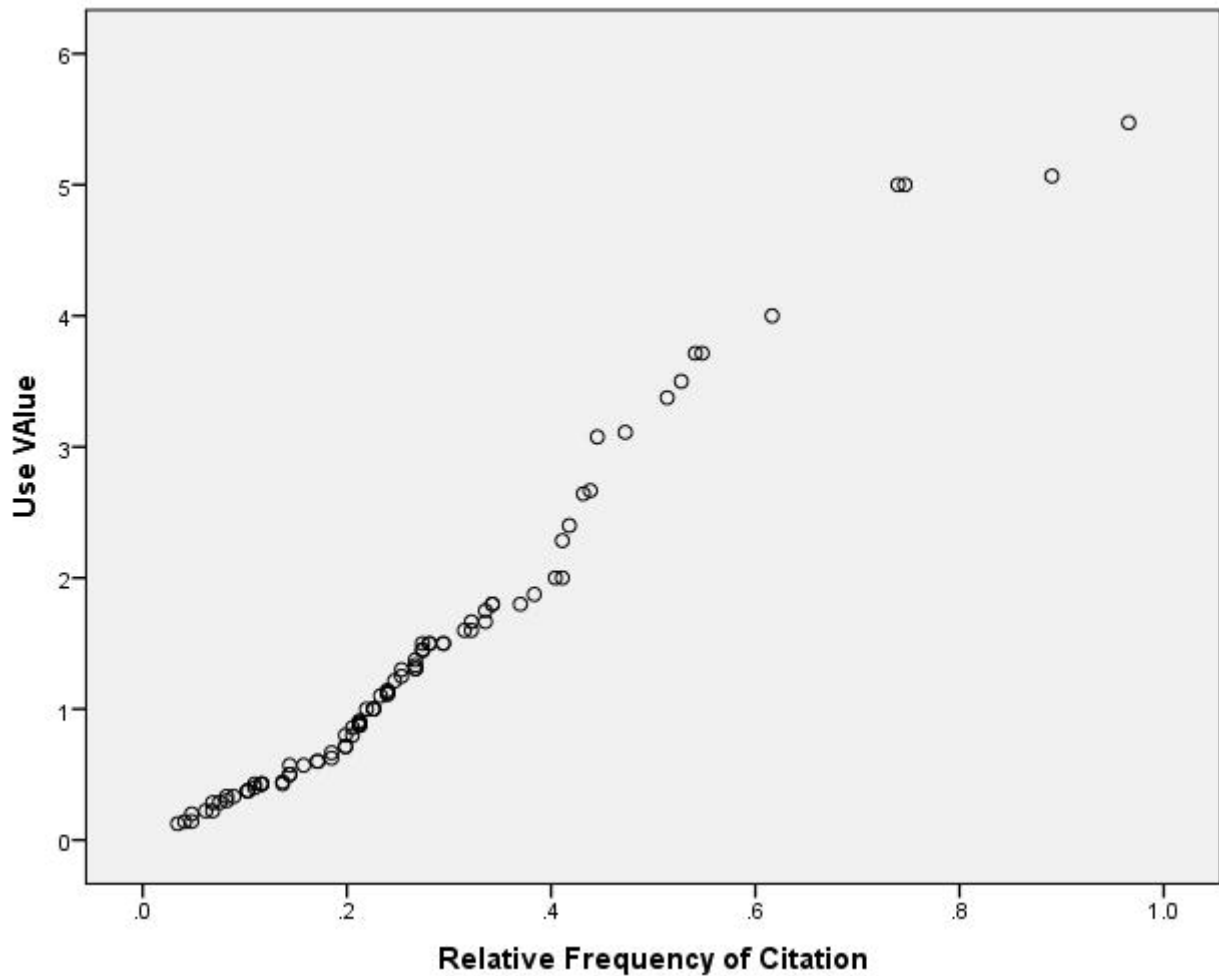

Source: https://www.biorxiv.org/content/biorxiv/early/2019/01/08/507848.full.pdf
